# Supplementary material for: A Bayesian network and heuristic approach for systematic characterization of radiotherapy receipt after breast-conservation surgery
Source: Springer Nature journal article supplement (doi:10.1186/s12911-017-0479-4), 2017-06-28
Supplement: MOESM1 [file 12488972]

## Supplementary

### Section 1

#### Categories per Variable

##### Primary Site

| <b>ID</b> |                                                                                   |
|-----------|-----------------------------------------------------------------------------------|
| C500      | Nipple (areolar)                                                                  |
| C501      | Central portion of breast (subareolar) area extending 1 cm around areolar complex |
| C502      | Upper inner quadrant (UIQ) of breast                                              |
| C503      | Lower inner quadrant (LIQ) of breast                                              |
| C504      | Upper outer quadrant (UOQ) of breast                                              |
| C505      | Lower outer quadrant (LOQ) of breast                                              |
| C506      | Axillary tail of breast                                                           |
| C508      | Overlapping lesion of breast                                                      |
| C509      | Breast, NOS                                                                       |

##### Tumor Size

| <b>Range</b> |                | <b>ID</b>  |
|--------------|----------------|------------|
| 0            | 5              | <b>S0</b>  |
| 6            | 11             | <b>S1</b>  |
| 12           | 17             | <b>S2</b>  |
| 18           | 23             | <b>S3</b>  |
| 24           | 29             | <b>S4</b>  |
| 30           | 35             | <b>S5</b>  |
| 36           | 41             | <b>S6</b>  |
| 42           | 47             | <b>S7</b>  |
| 48           | 53             | <b>S8</b>  |
| 54           | 59             | <b>S9</b>  |
| 60           | 65             | <b>S10</b> |
| 66           | 71             | <b>S11</b> |
| 72           | 77             | <b>S12</b> |
| 78           | 83             | <b>S13</b> |
| 84           | 89             | <b>S14</b> |
| 90           | 95             | <b>S15</b> |
| 96           | 101            | <b>S16</b> |
| ≥102         |                | <b>S17</b> |
| Unknown      | Not Applicable | <b>S21</b> |

## Histology

| ID  | HISTO3V | Name Category                   | Name Specific                                              |
|-----|---------|---------------------------------|------------------------------------------------------------|
| H1  | 8201    | ADENOID CYSTIC & CRIBRIFORM CA. | Cribriform carcinoma in situ                               |
| H2  | 8211    | ADENOC. IN ADENOMA. POLYP       | Tubular adenocarcinoma                                     |
| H3  | 8230    | SOLID CARCINOMA, NOS            | Duct carcinoma in situ, solid type                         |
| H4  | 8480    | MUCINOUS ADENOCARCINOMA         | Mucinous adenocarcinoma                                    |
| H5  | 8500    | DUCT CARCINOMA                  | Intraductal carcinoma, noninfiltrating, NOS                |
| H6  | 8501    | DUCT CARCINOMA                  | Comedocarcinoma, non-infiltrating                          |
| H7  | 8503    | DUCT CARCINOMA                  | Noninfiltrating intraductal papillary adenocarcinoma       |
| H8  | 8507    | DUCT CARCINOMA                  | Intraductal micropapillary carcinoma                       |
| H9  | 8520    | LOBULAR AND OTHER DUCTAL CA.    | Lobular carcinoma in situ                                  |
| H10 | 8522    | LOBULAR AND OTHER DUCTAL CA.    | Intraductal and lobular in situ carcinoma                  |
| H11 | 8523    | LOBULAR AND OTHER DUCTAL CA.    | Infiltr. duct mixed with other types of carcinoma, in situ |

## Grade

| ID | Description                                                                                                     |
|----|-----------------------------------------------------------------------------------------------------------------|
| G1 | Grade I; grade i; grade 1; well differentiated; differentiated, NOS                                             |
| G2 | Grade II; grade ii; grade 2; moderately differentiated; moderately differentiated; intermediate differentiation |
| G3 | Grade III; grade iii; grade 3; poorly differentiated; differentiated                                            |
| G4 | Grade IV; grade iv; grade 4; undifferentiated; anaplastic                                                       |
| G9 | cell type not determined, not stated or not applicable                                                          |

## Behavior

| ID | Description |
|----|-------------|
| B2 | In situ     |
| B3 | Invasive    |

## Age

| ID |              |
|----|--------------|
| R1 | <=25         |
| R2 | 25> and <=50 |
| R3 | 50> and <=75 |
| R4 | >75          |

### Marital Status

| <b>ID</b> | <b>Description</b>                                                       |
|-----------|--------------------------------------------------------------------------|
| M1        | Single (never married)                                                   |
| M2        | Married (including common law)                                           |
| M3        | Separated                                                                |
| M4        | Divorced                                                                 |
| M5        | Widowed                                                                  |
| M6        | Unmarried or domestic partner (same sex or opposite sex or unregistered) |
| M9        | Unknown                                                                  |

### Insurance

| <b>ID</b> | <b>Description</b> |
|-----------|--------------------|
| I1        | Uninsured          |
| I2        | Any Medicaid       |
| I3        | Insured            |
| I9        | Not available      |

### Race

| <b>ID</b> | <b>Description</b> |
|-----------|--------------------|
| W         | White              |
| B         | Black              |
| O         | Other              |
| U         | Unknown            |

### Willingness Radiotherapy

| <b>ID</b> | <b>Description</b> |
|-----------|--------------------|
| NR1       | Not Declined       |
| NR2       | Declined           |

## Bayesian Network Learning

### Outcome Hill-Climbing

| from | to | strength | direction |
|------|----|----------|-----------|
| M    | R  | 1        | 0.536     |
| M    | IN | 0.983    | 0.504578  |
| M    | A  | 1        | 0.499     |
| P    | B  | 0.996    | 0.305723  |
| G    | W  | 0.242    | 0.997934  |
| G    | T  | 0.955    | 0.973822  |
| G    | H  | 1        | 0.952     |
| I    | S  | 1        | 0.51      |
| I    | B  | 1        | 0.523     |
| I    | A  | 0.96     | 0.495313  |
| S    | G  | 0.436    | 0.90367   |
| S    | I  | 1        | 0.49      |
| S    | B  | 0.544    | 0.492647  |
| S    | TS | 1        | 0.556     |
| W    | T  | 1        | 0.109     |
| W    | H  | 0.117    | 0.324786  |
| B    | P  | 0.996    | 0.694277  |
| B    | G  | 0.588    | 0.97534   |
| B    | I  | 1        | 0.477     |
| B    | S  | 0.544    | 0.507353  |
| B    | A  | 0.311    | 0.482315  |
| B    | T  | 0.949    | 0.988936  |
| B    | H  | 0.976    | 0.993852  |
| R    | M  | 1        | 0.464     |
| R    | G  | 0.259    | 1         |
| IN   | M  | 0.983    | 0.495422  |
| A    | M  | 1        | 0.501     |
| A    | I  | 0.96     | 0.504688  |
| A    | W  | 0.603    | 0.995025  |
| A    | B  | 0.311    | 0.517685  |
| A    | T  | 1        | 0.9955    |
| T    | Y  | 0.348    | 1         |
| T    | P  | 0.25     | 0.992     |
| T    | W  | 1        | 0.891     |
| T    | H  | 0.572    | 0.563811  |
| T    | TS | 0.122    | 0.729508  |
| H    | W  | 0.117    | 0.675214  |

|    |   |       |          |
|----|---|-------|----------|
| H  | T | 0.572 | 0.436189 |
| TS | G | 0.564 | 0.988475 |
| TS | S | 1     | 0.444    |
| TS | T | 0.122 | 0.270492 |

### BN learning conditions

\$whitelist  
NULL

\$blacklist  
NULL

\$test  
[1] "none"

\$ntests  
[1] 0

\$algo  
[1] "averaged"

\$args  
\$args\$threshold  
[1] 0.25

### BN Nodes

\$M  
\$M\$mb  
[1] "R" "IN" "A"

\$M\$nbr  
[1] "R" "IN" "A"

\$M\$parents  
[1] "A"

\$M\$children  
[1] "R" "IN"

\$Y  
\$Y\$mb  
[1] "T"

\$Y\$nbr  
[1] "T"

\$Y\$parents  
[1] "T"

\$Y\$children  
character(0)

\$P  
\$P\$mb  
[1] "B"

\$P\$nbr  
[1] "B"

\$P\$parents  
[1] "B"

\$P\$children  
character(0)

\$G  
\$G\$mb  
[1] "S" "B" "R" "A" "T" "H" "TS"

\$G\$nbr  
[1] "S" "B" "R" "T" "H" "TS"

\$G\$parents  
[1] "S" "B" "R" "TS"

\$G\$children  
[1] "T" "H"

\$I  
\$I\$mb  
[1] "S" "B" "A"

\$I\$nbr  
[1] "S" "B" "A"

\$I\$parents  
[1] "A"

\$I\$children  
[1] "S" "B"

\$S  
\$S\$mb  
[1] "G" "I" "B" "R" "TS"

\$S\$nbr  
[1] "G" "I" "B" "TS"

\$S\$parents  
[1] "I" "B"

\$S\$children

[1] "G" "TS"

\$w

\$w\$mb

[1] "A" "T"

\$w\$nbr

[1] "A" "T"

\$w\$parents

[1] "A" "T"

\$w\$children

character(0)

\$B

\$B\$mb

[1] "P" "G" "I" "S" "R" "A" "T" "H" "TS"

\$B\$nbr

[1] "P" "G" "I" "S" "A" "T" "H"

\$B\$parents

[1] "I" "A"

\$B\$children

[1] "P" "G" "S" "T" "H"

\$R

\$R\$mb

[1] "M" "G" "S" "B" "TS"

\$R\$nbr

[1] "M" "G"

\$R\$parents

[1] "M"

\$R\$children

[1] "G"

\$IN

\$IN\$mb

[1] "M"

\$IN\$nbr

[1] "M"

\$IN\$parents

[1] "M"

\$IN\$children

character(0)

\$A  
\$A\$mb  
[1] "M" "G" "I" "W" "B" "T"

\$A\$nbr  
[1] "M" "I" "W" "B" "T"

\$A\$parents  
character(0)

\$A\$children  
[1] "M" "I" "W" "B" "T"

\$T  
\$T\$mb  
[1] "Y" "G" "W" "B" "A" "H"

\$T\$nbr  
[1] "Y" "G" "W" "B" "A" "H"

\$T\$parents  
[1] "G" "B" "A"

\$T\$children  
[1] "Y" "W" "H"

\$H  
\$H\$mb  
[1] "G" "B" "T"

\$H\$nbr  
[1] "G" "B" "T"

\$H\$parents  
[1] "G" "B" "T"

\$H\$children  
character(0)

\$TS  
\$TS\$mb  
[1] "G" "S" "B" "R"

\$TS\$nbr  
[1] "G" "S"

\$TS\$parents  
[1] "S"

\$TS\$children  
[1] "G"



## BN Arcs

|       | from | to   |
|-------|------|------|
| [1,]  | "M"  | "R"  |
| [2,]  | "M"  | "IN" |
| [3,]  | "G"  | "T"  |
| [4,]  | "G"  | "H"  |
| [5,]  | "I"  | "S"  |
| [6,]  | "I"  | "B"  |
| [7,]  | "S"  | "G"  |
| [8,]  | "S"  | "TS" |
| [9,]  | "B"  | "P"  |
| [10,] | "B"  | "G"  |
| [11,] | "B"  | "S"  |
| [12,] | "B"  | "T"  |
| [13,] | "B"  | "H"  |
| [14,] | "R"  | "G"  |
| [15,] | "A"  | "M"  |
| [16,] | "A"  | "I"  |
| [17,] | "A"  | "W"  |
| [18,] | "A"  | "B"  |
| [19,] | "A"  | "T"  |
| [20,] | "T"  | "Y"  |
| [21,] | "T"  | "W"  |
| [22,] | "T"  | "H"  |
| [23,] | "TS" | "G"  |

## BN Analysis

# Setting Treatment, Stage (BCS,Stage 0)

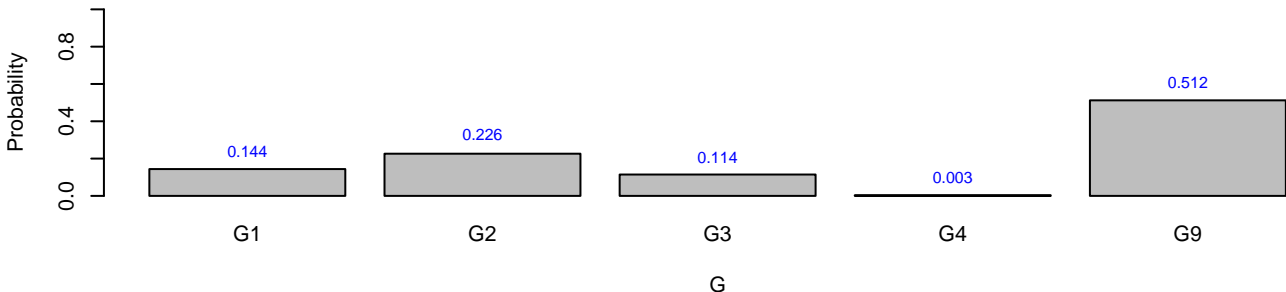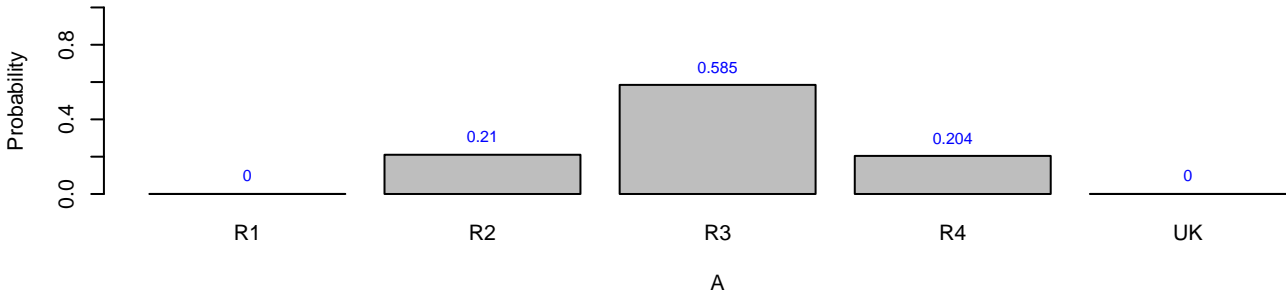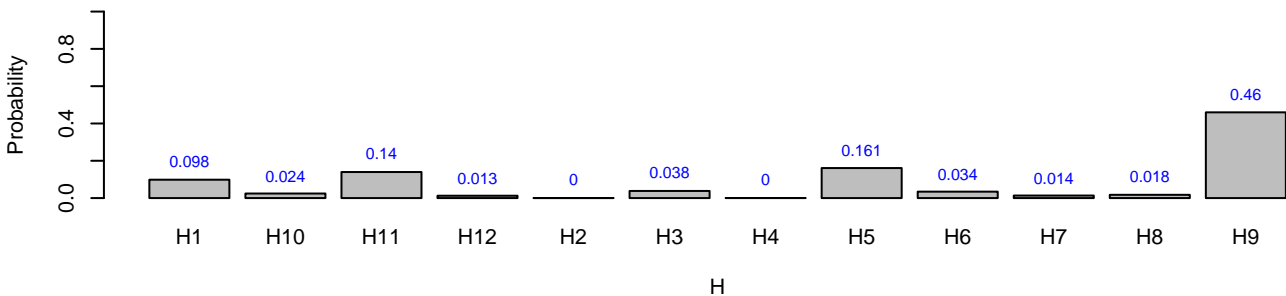

### Setting Treatment, Stage (BCS,Stage 0)

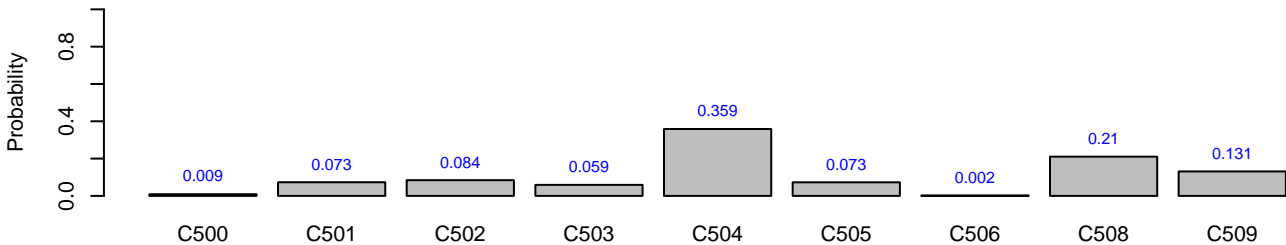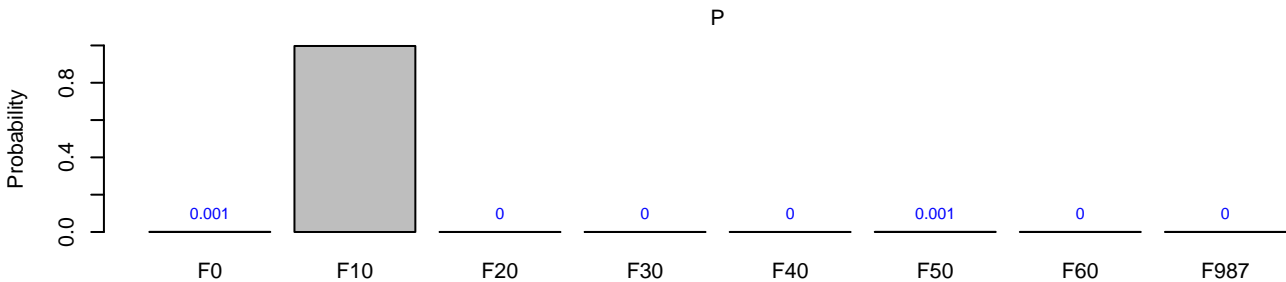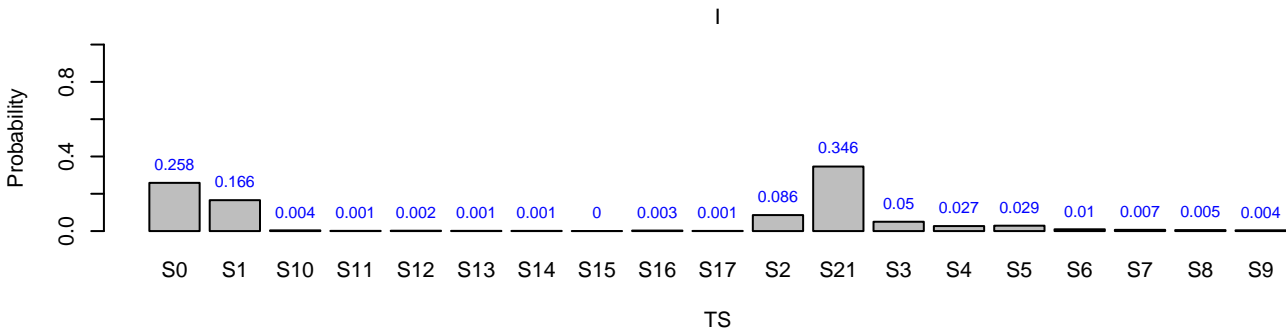

# Setting Treatment, Stage (BCSR,Stage 0)

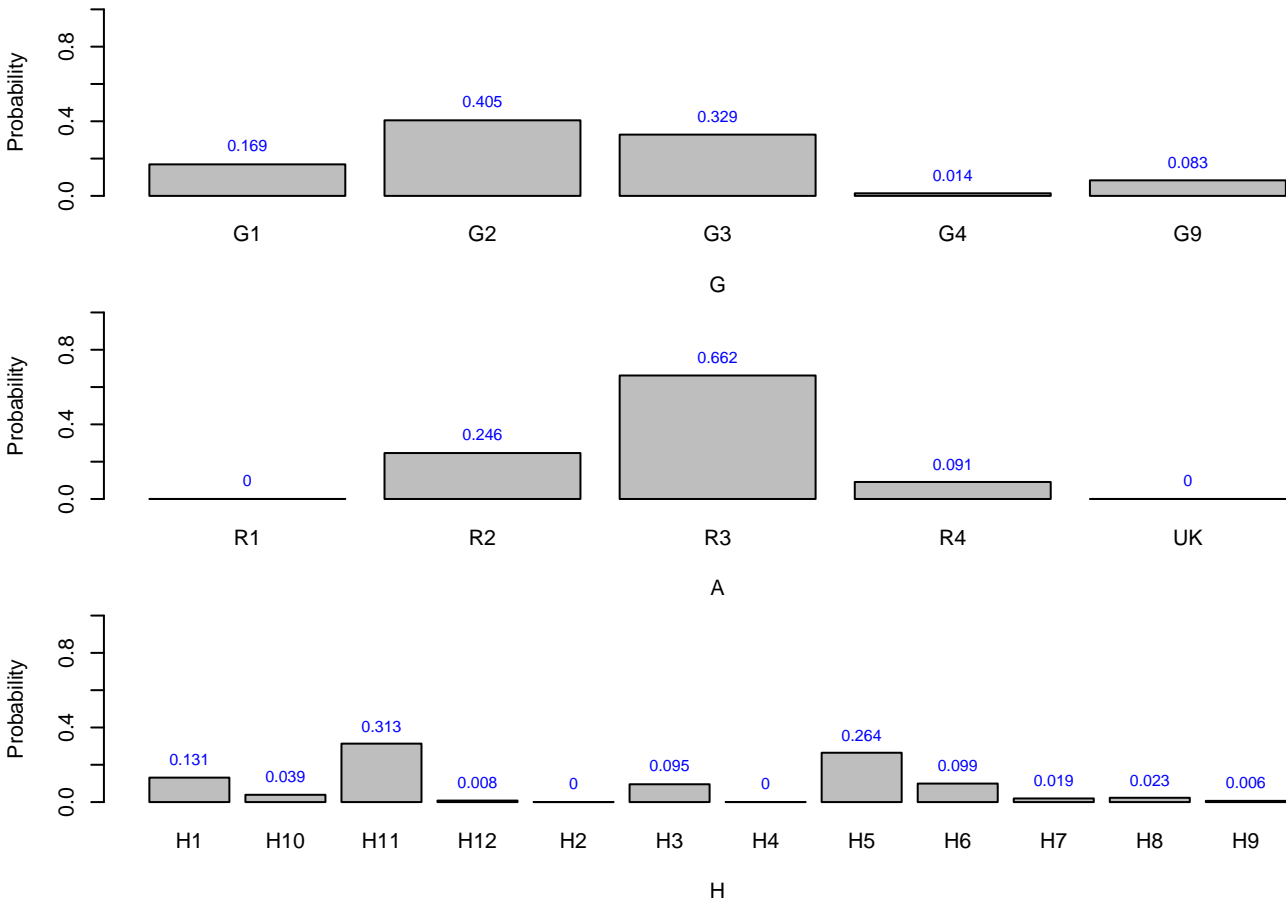

# Setting Treatment, Stage (BCSR,Stage 0)

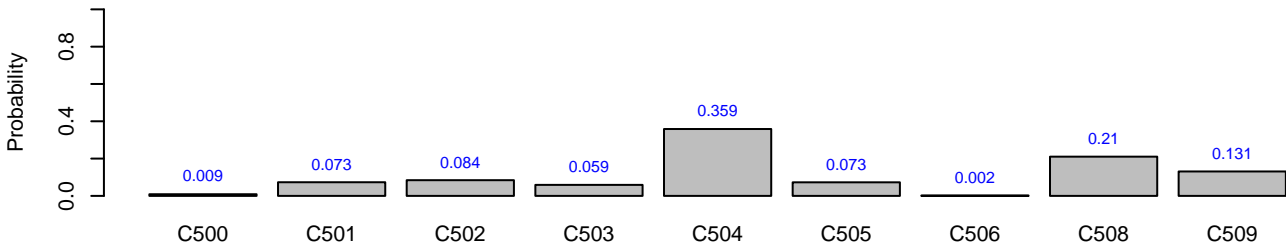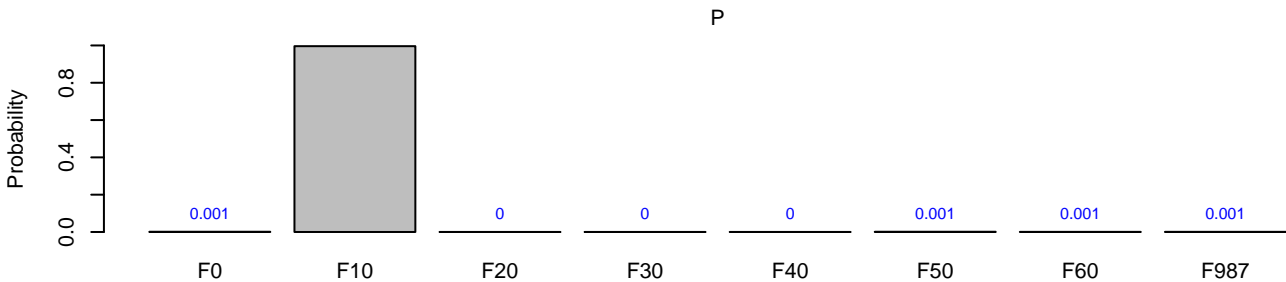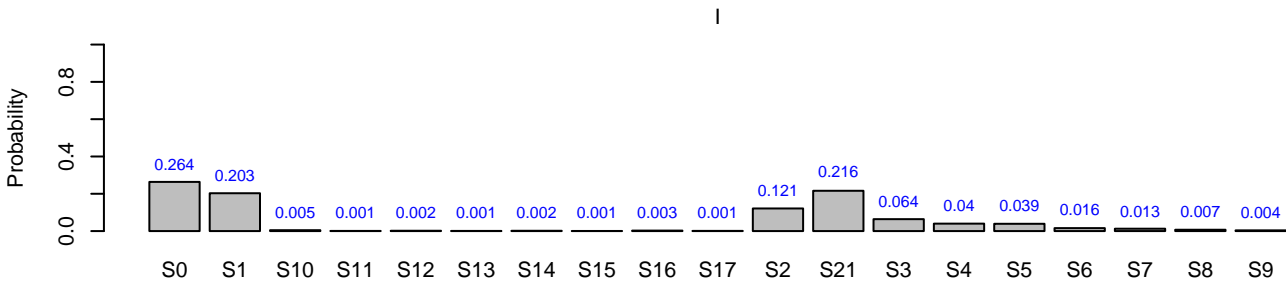

TS

# Setting Treatment, Stage (BCS,Stage 1)

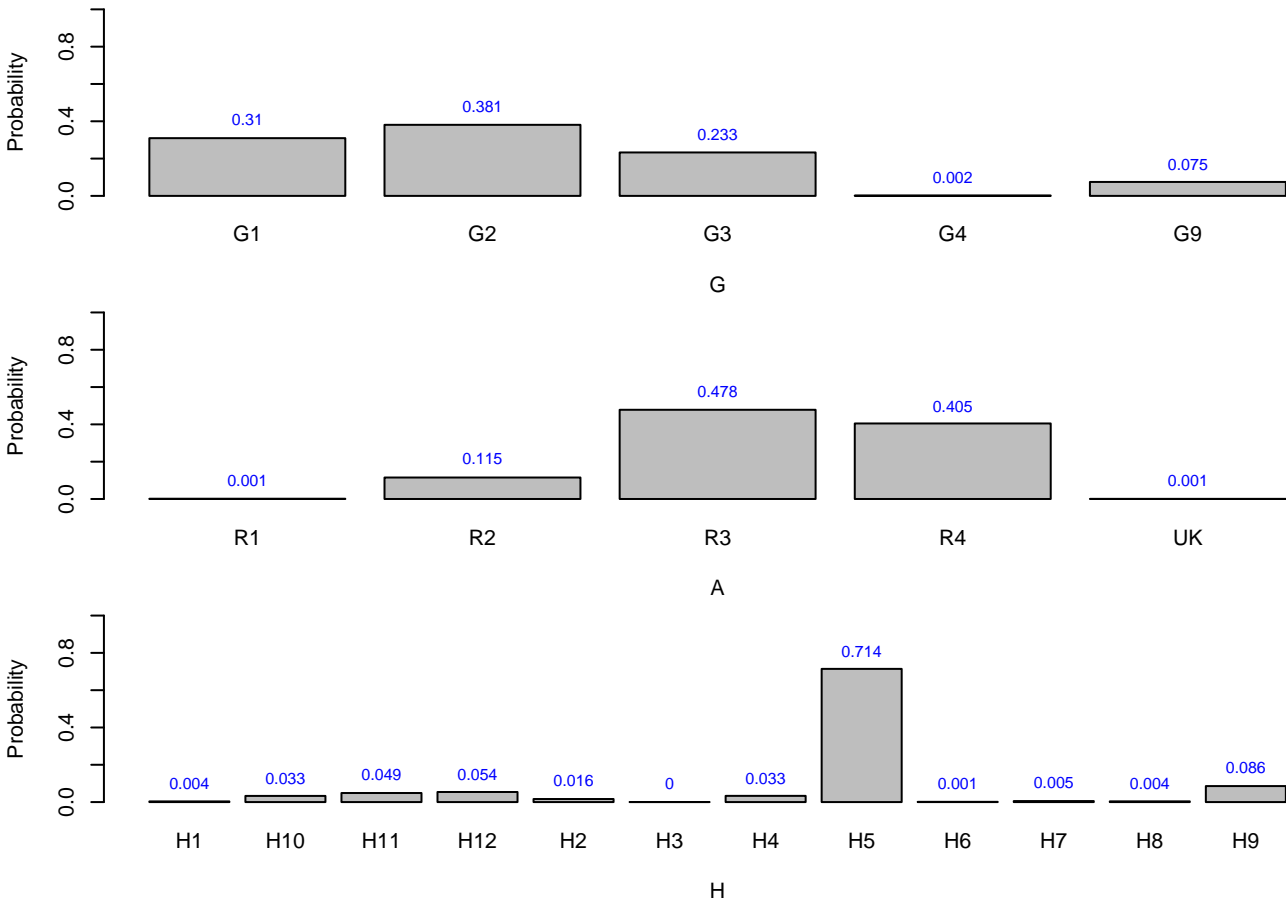

# Setting Treatment, Stage (BCS,Stage 1)

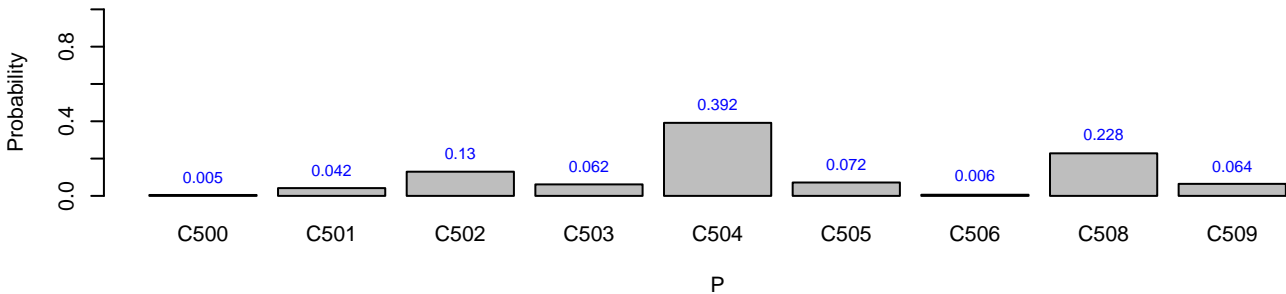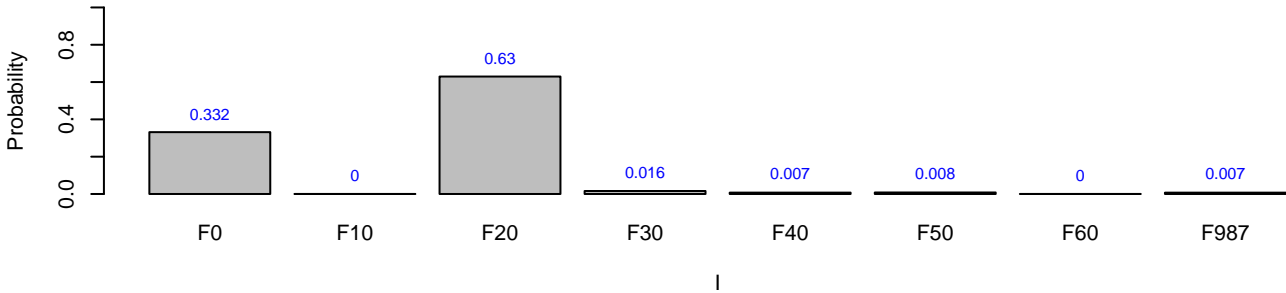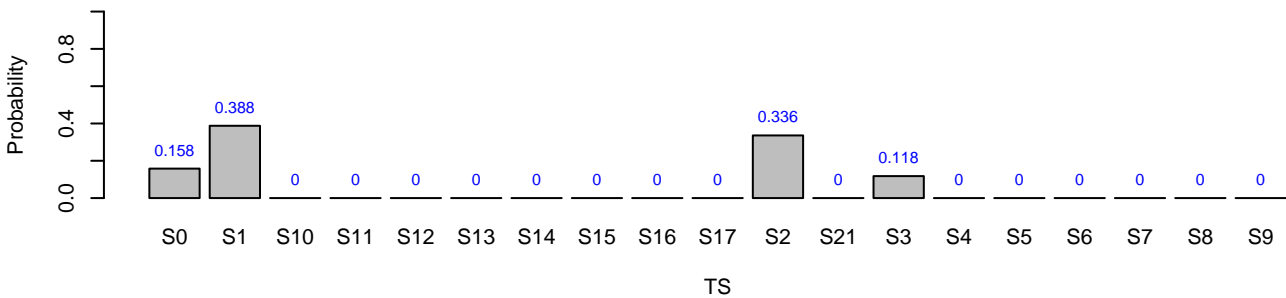

# Setting Treatment, Stage (BCSR,Stage 1)

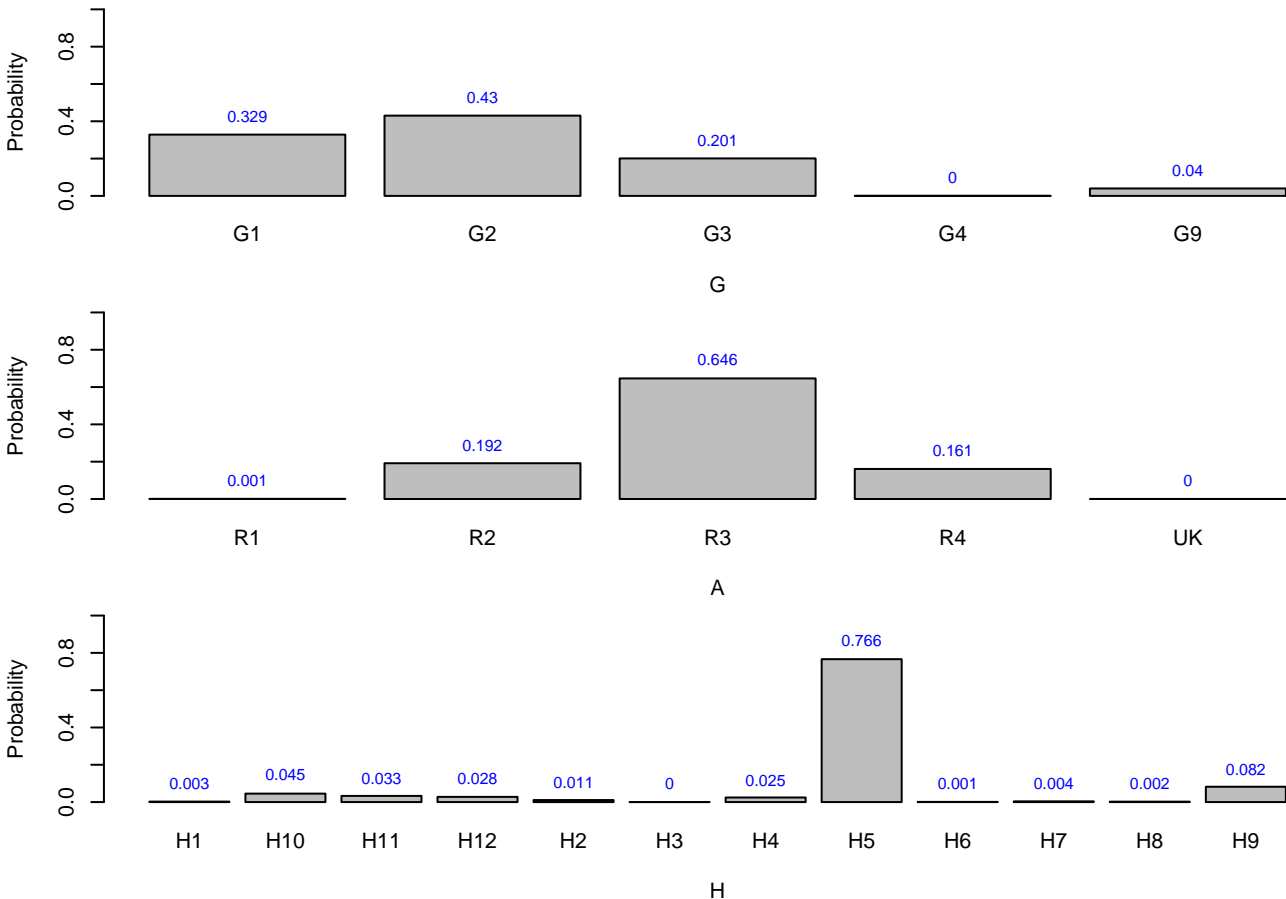



# Setting Treatment, Stage (BCSR,Stage 1)

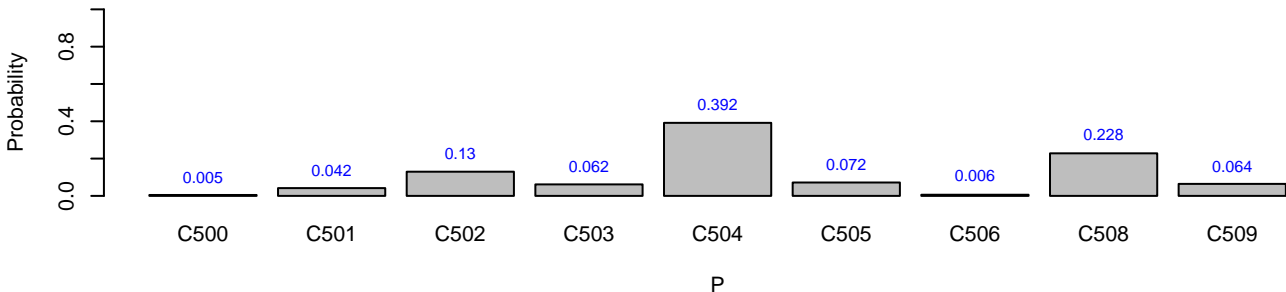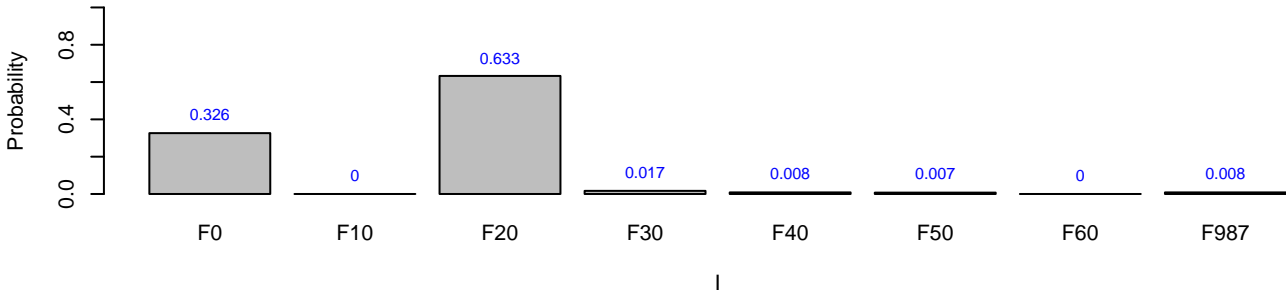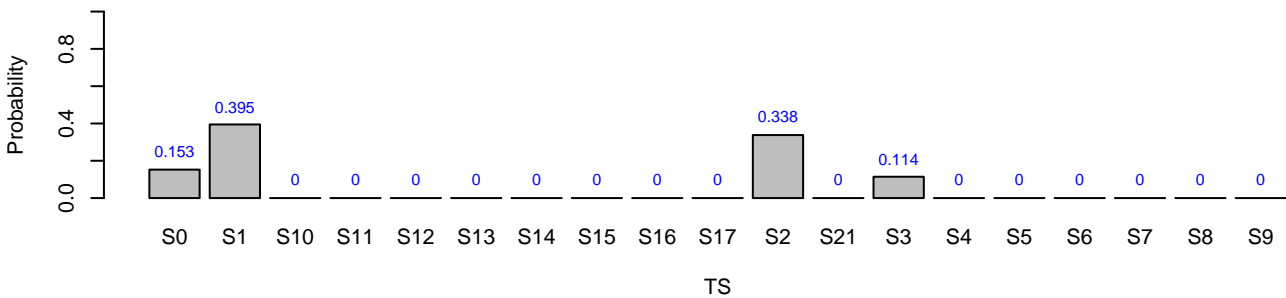

# Setting Treatment, Stage (BCS,Stage 2A)

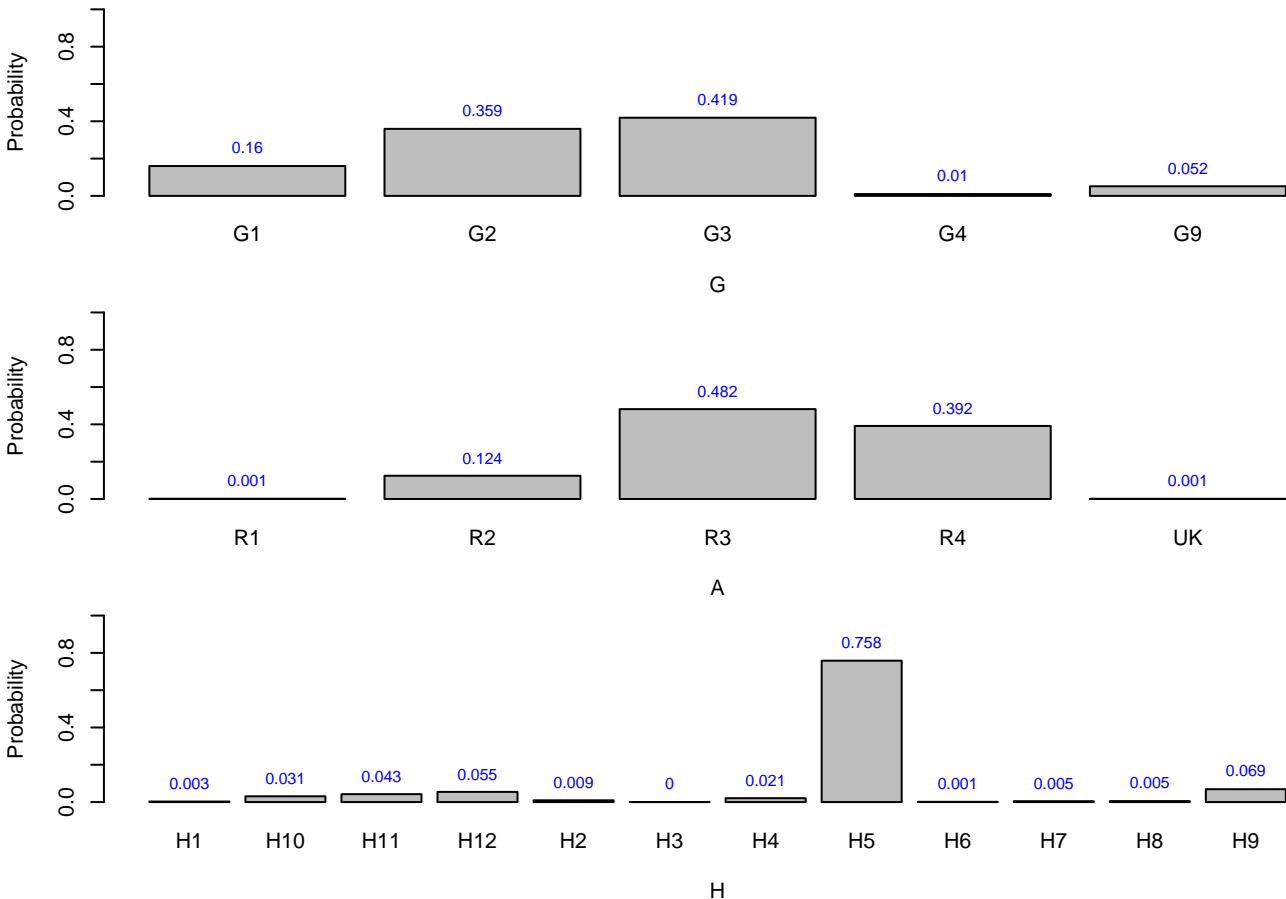

# Setting Treatment, Stage (BCS,Stage 2A)

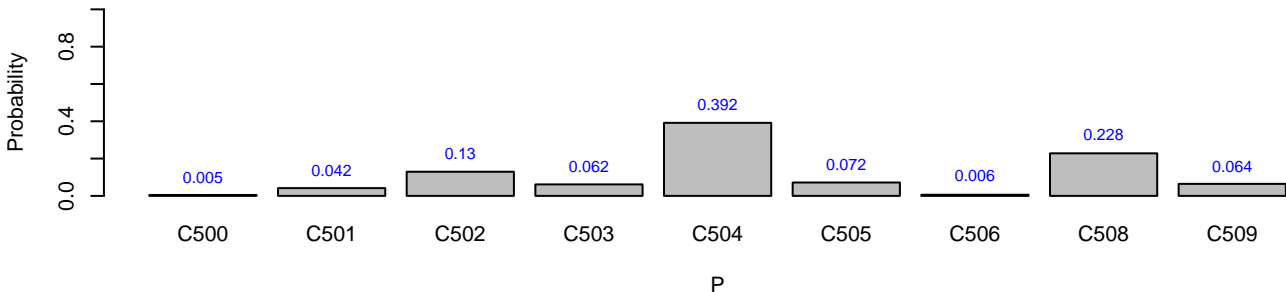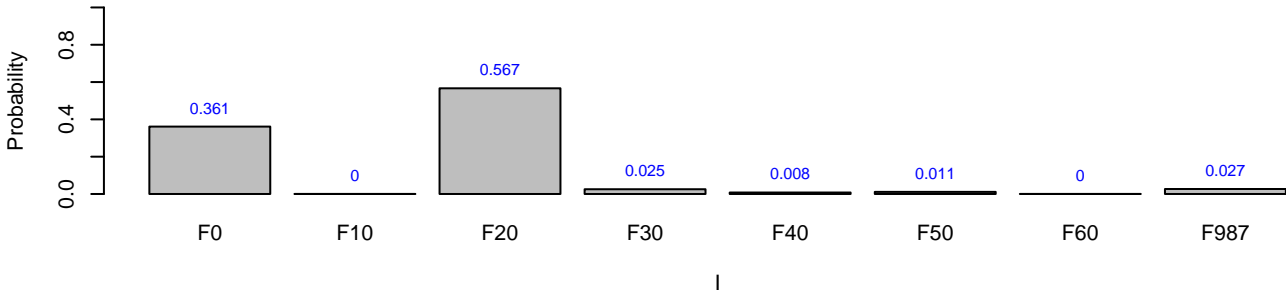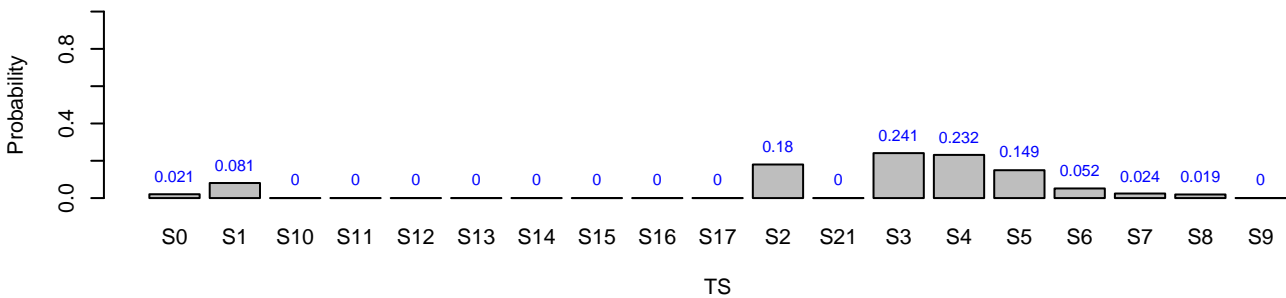

# Setting Treatment, Stage (BCSR, Stage 2A)

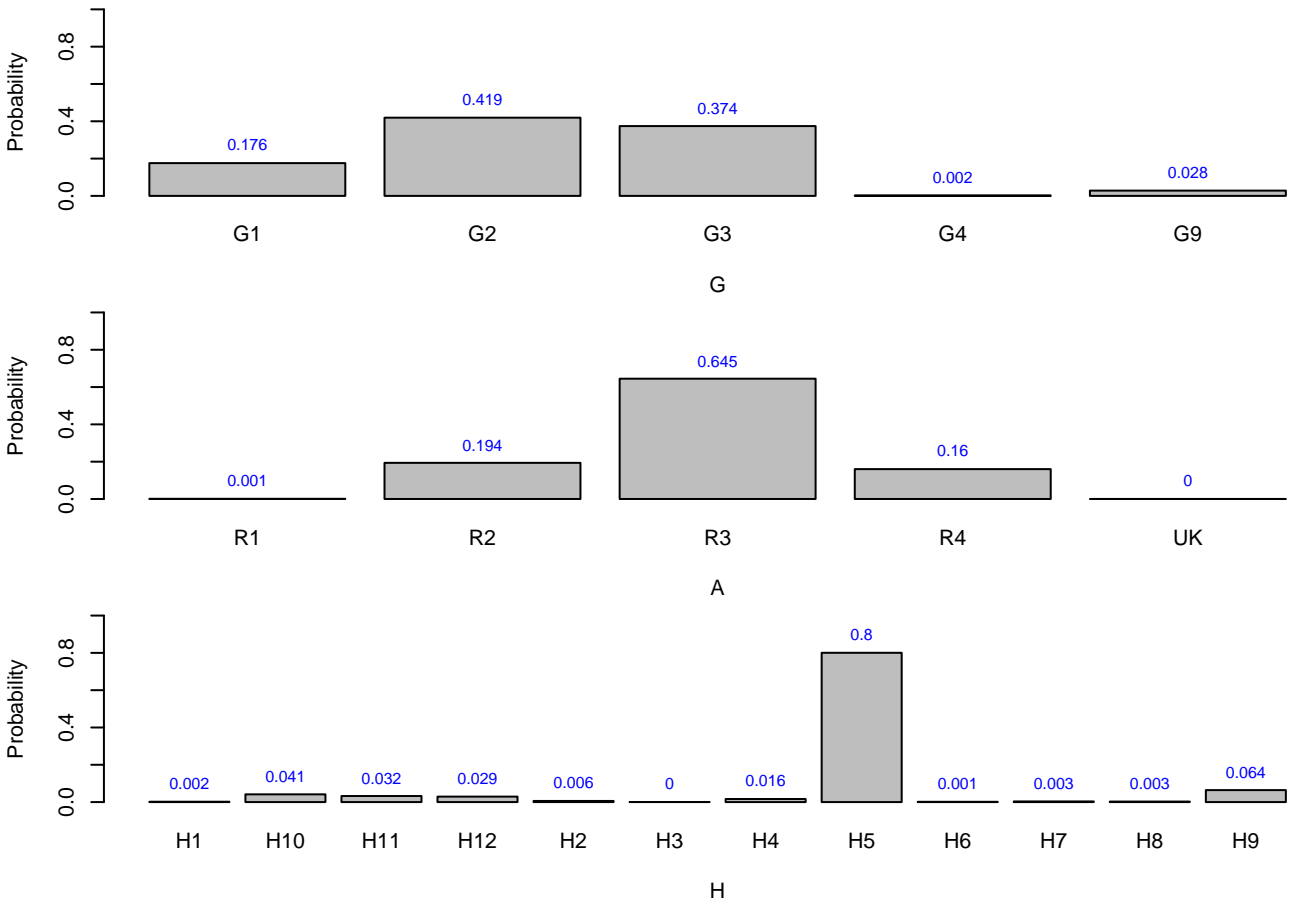

# Setting Treatment, Stage (BCSR, Stage 2A)

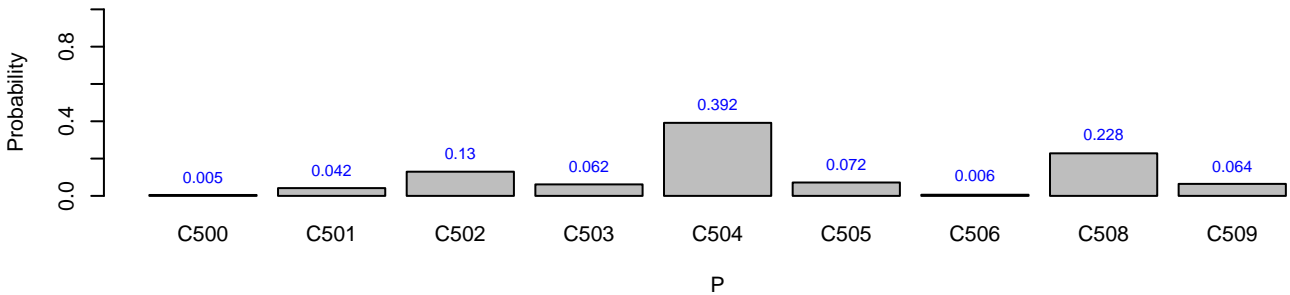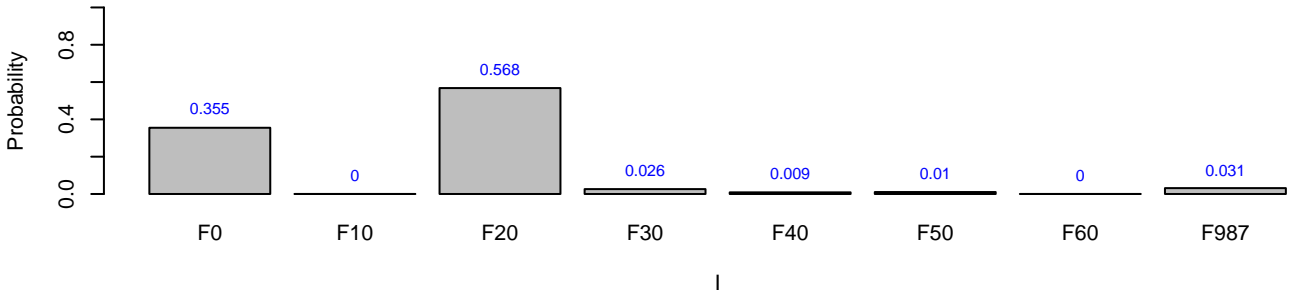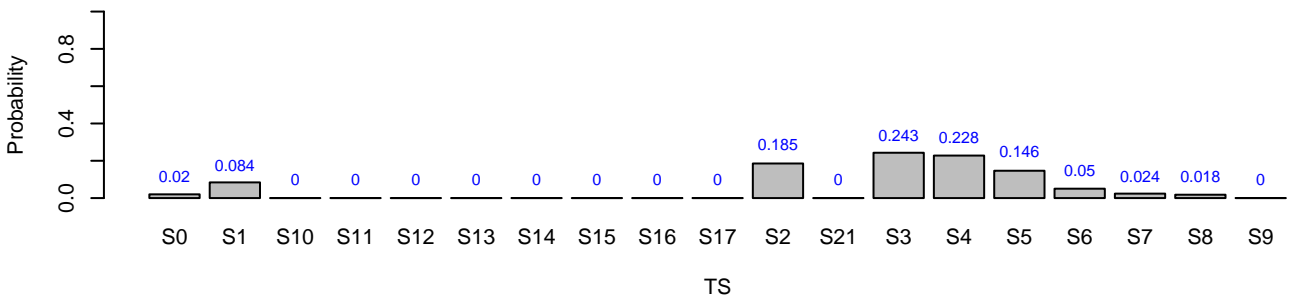

# Setting Treatment, Stage (BCS,Stage 2B)

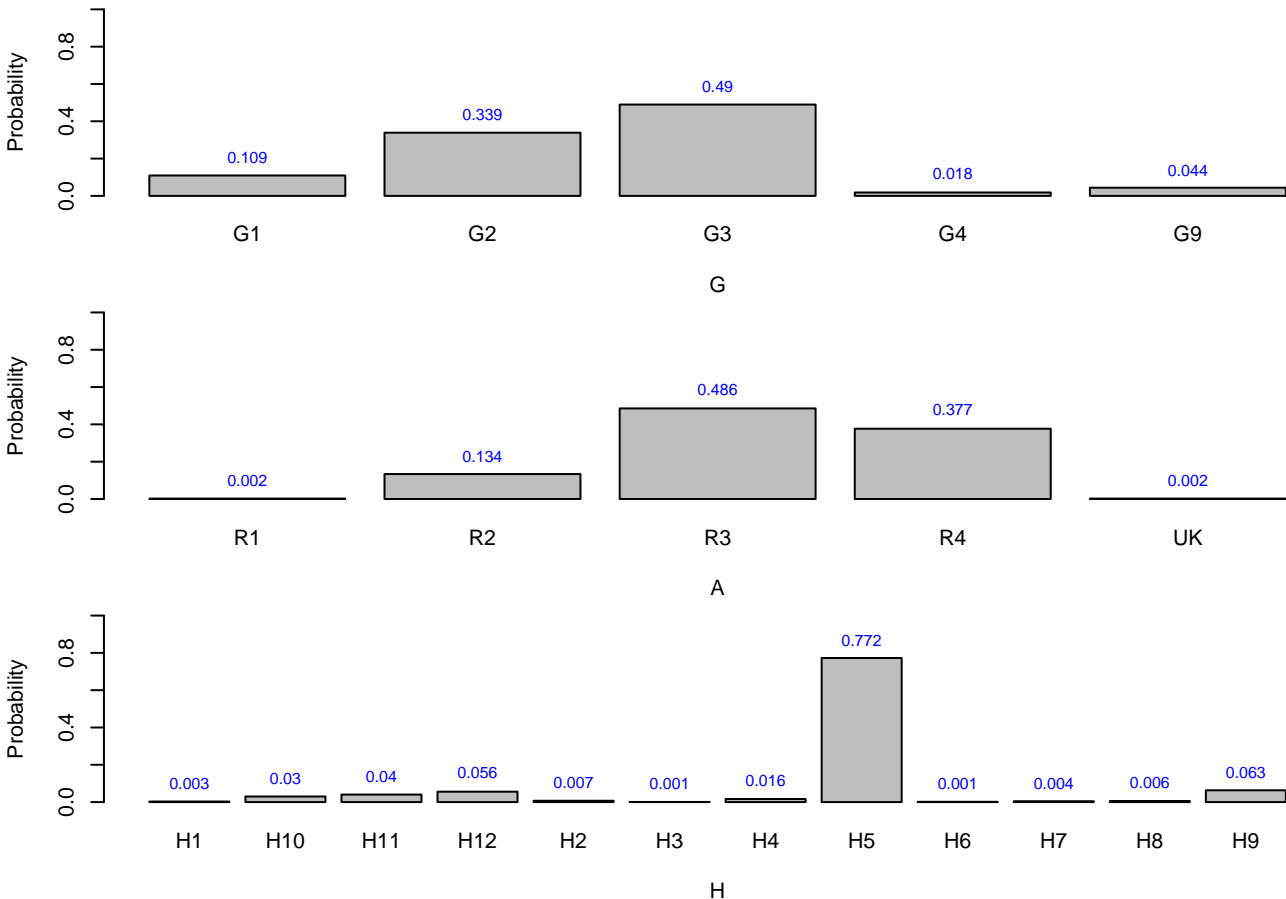

# Setting Treatment, Stage (BCS,Stage 2B)

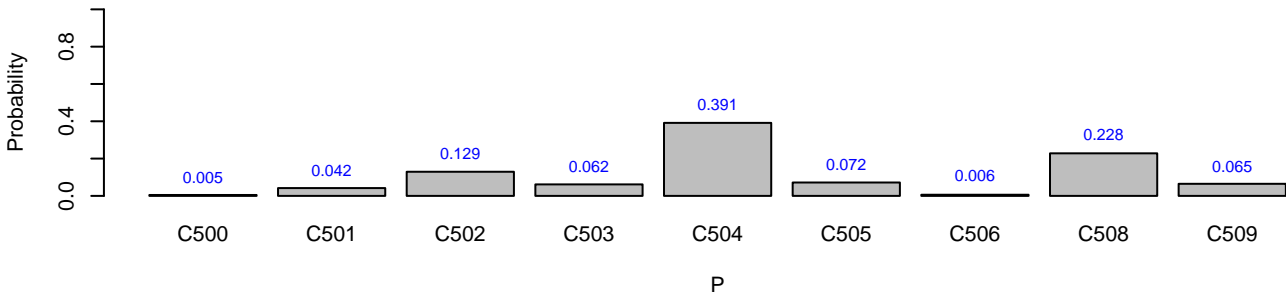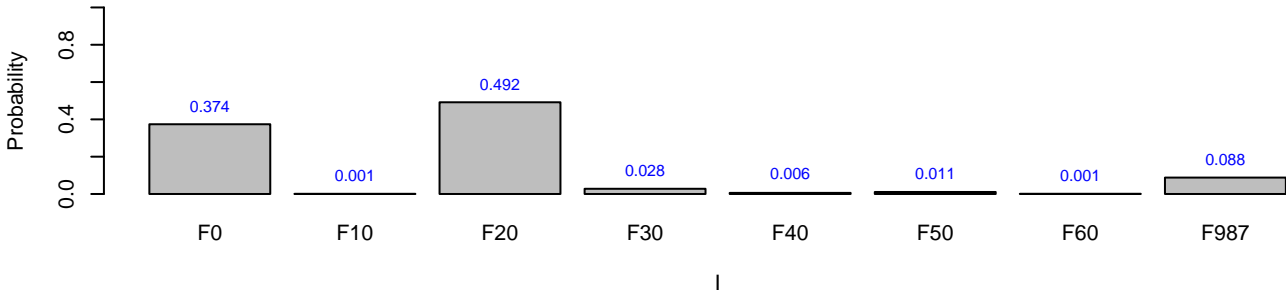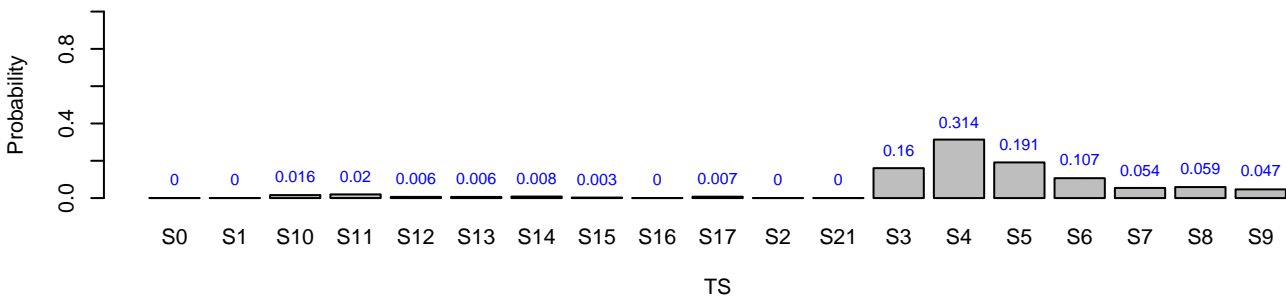

# Setting Treatment, Stage (BCSR, Stage 2B)

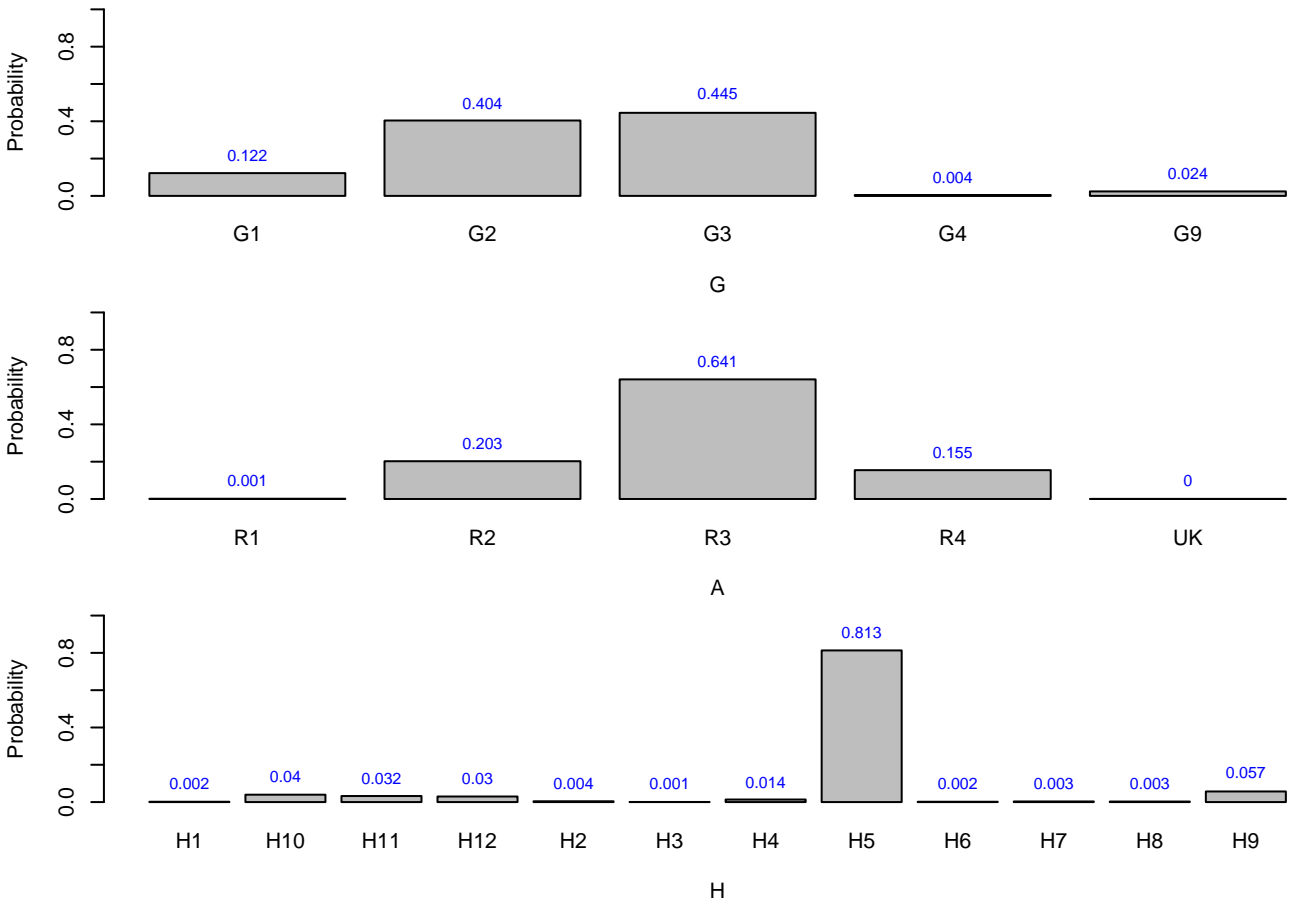



# Setting Treatment, Stage (BCSR, Stage 2B)

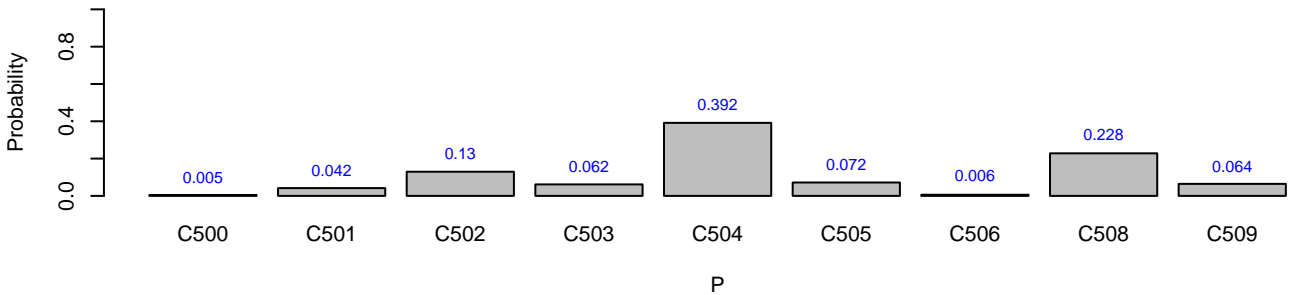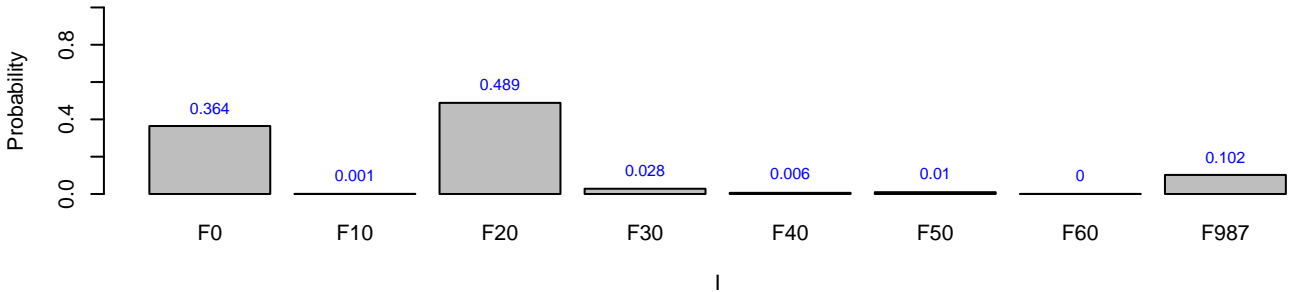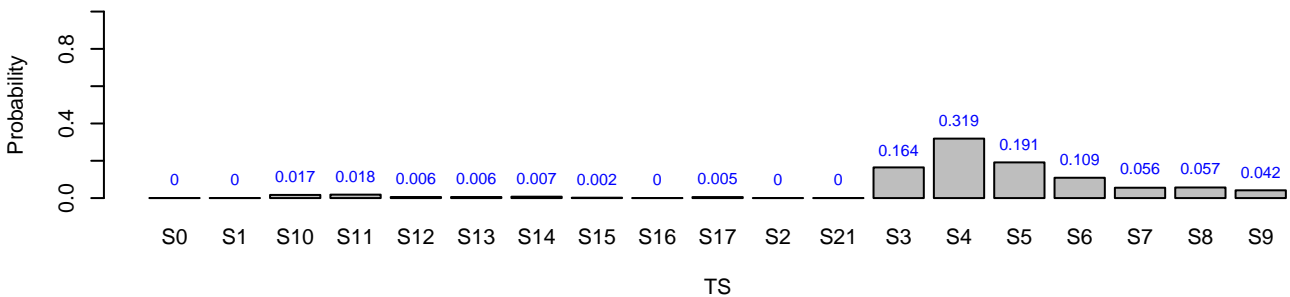

# Setting Treatment, Stage, G (BCS, St0,G9)

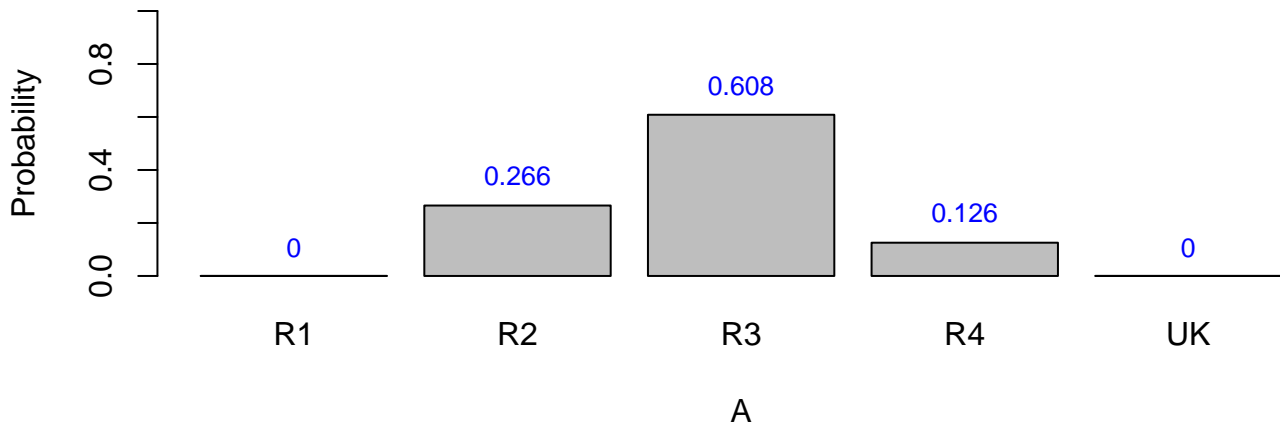

A

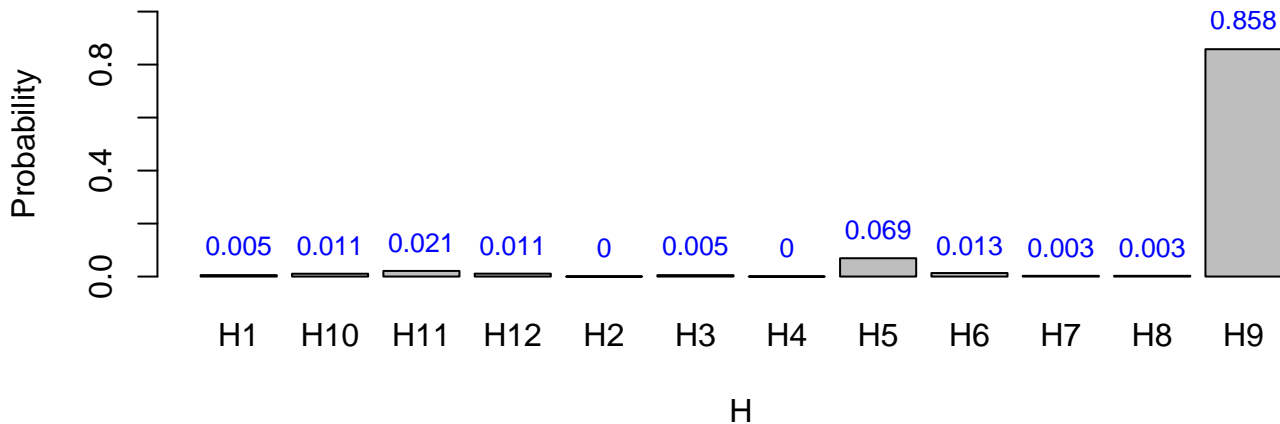

H

# Setting Treatment, Stage, G (BCS, St0,G9)

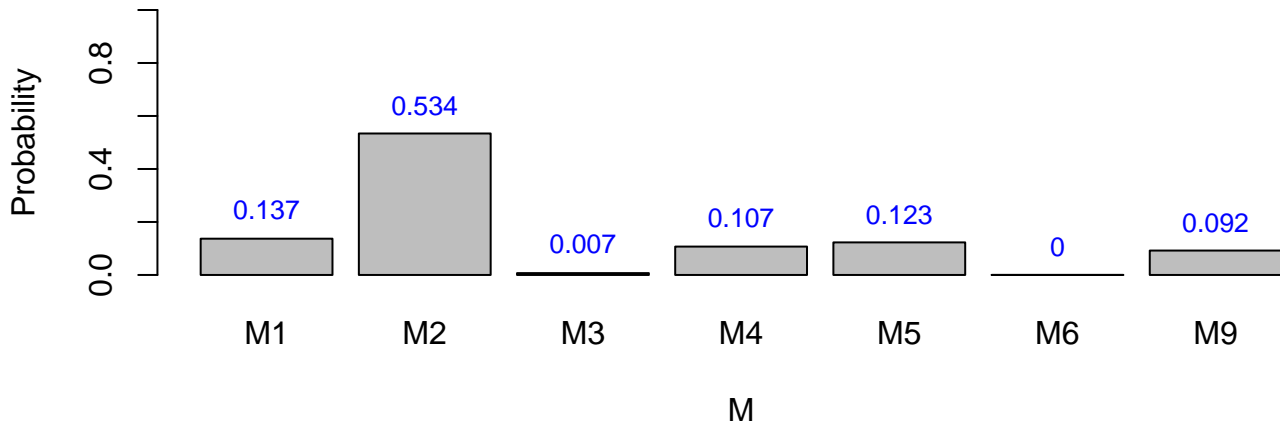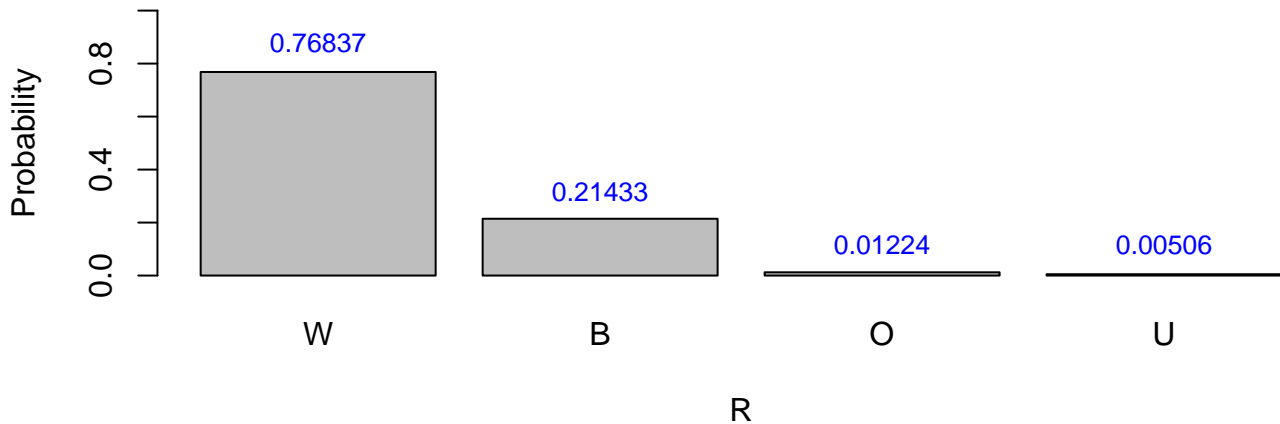

# Setting Treatment, Stage, G (BCSR, St0,G9)

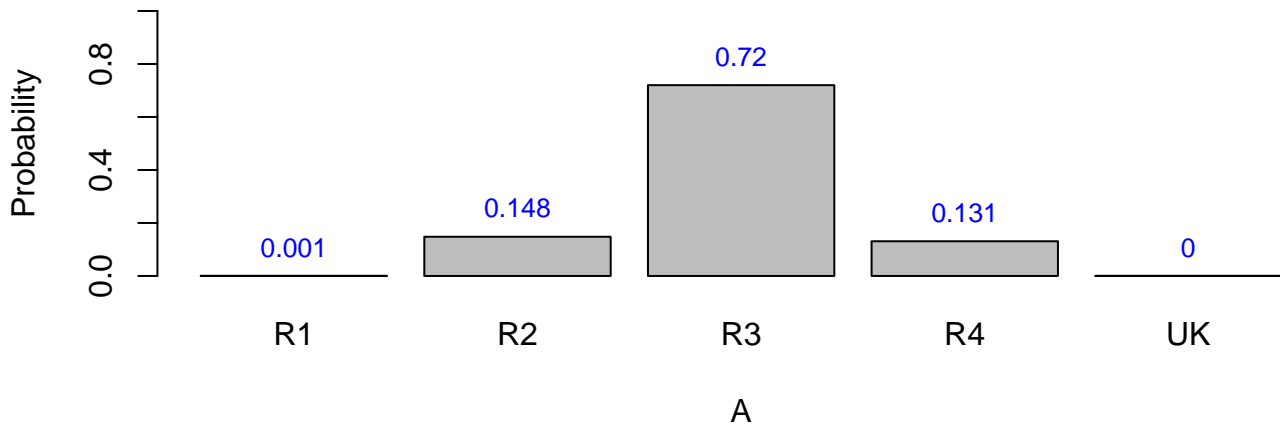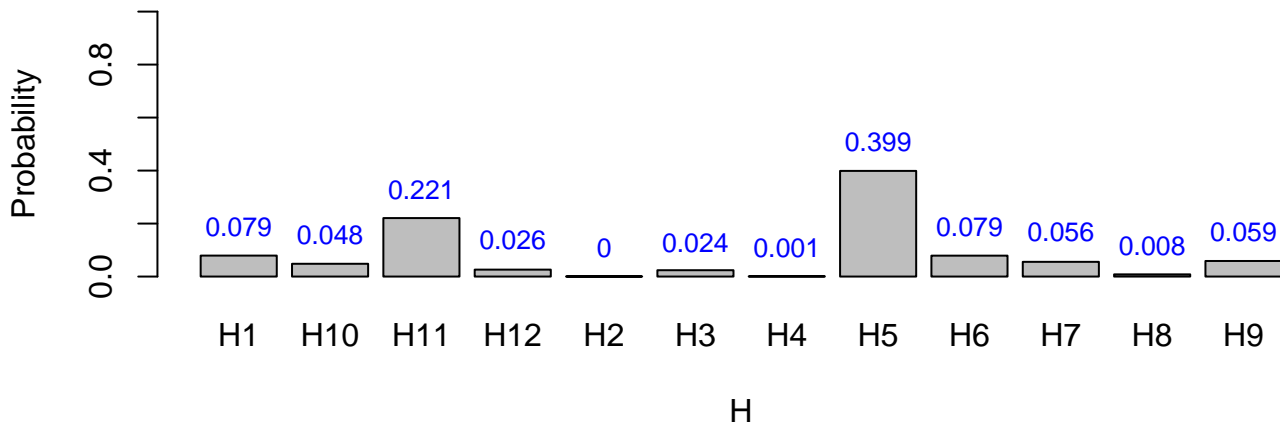

# Setting Treatment, Stage, G (BCSR, St0,G9)

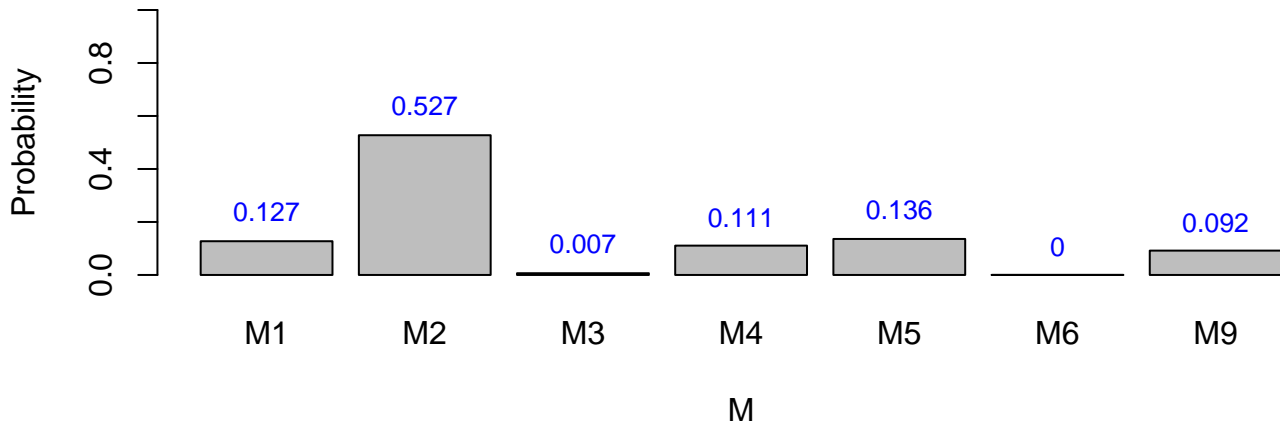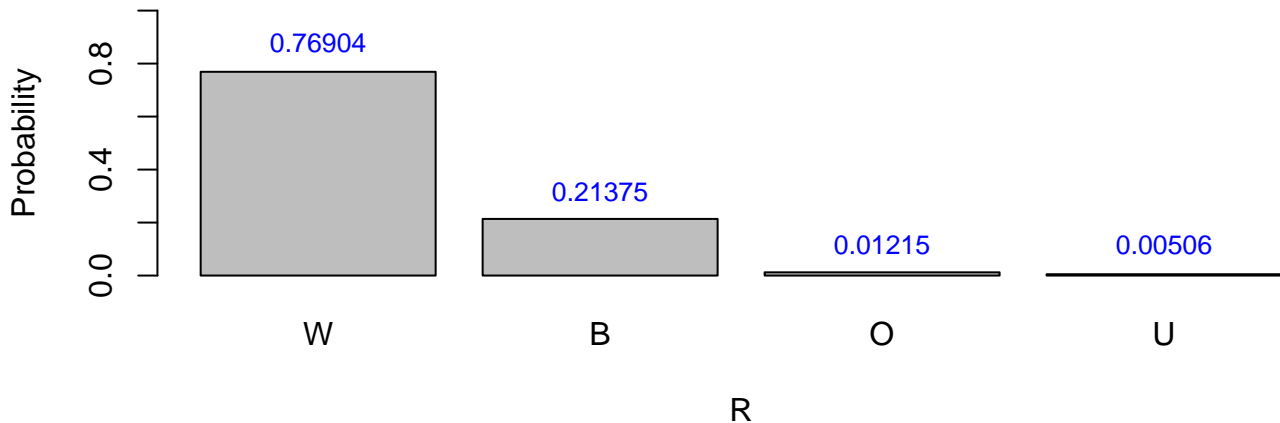

# Setting T, S, G, H (BCS, St0,G9, H9)

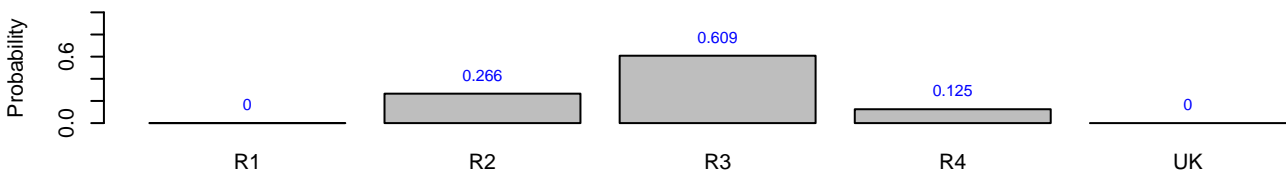

A

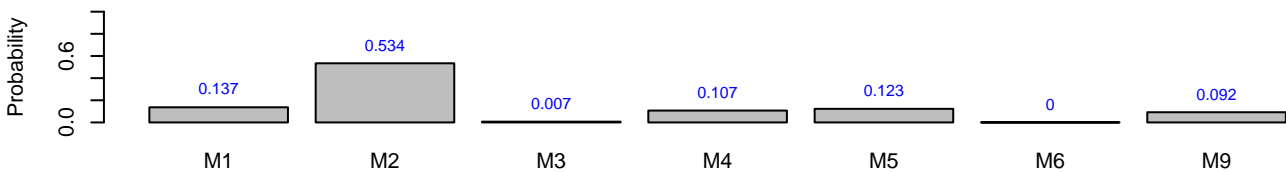

M

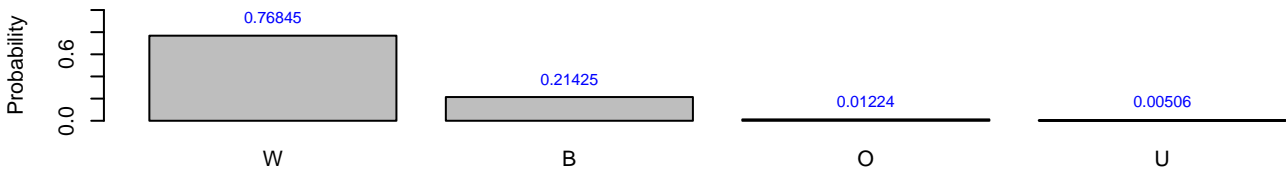

R

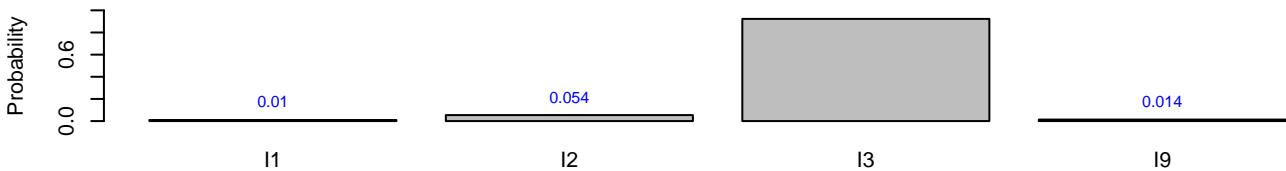

IN

# Setting T, S, G, H (BCSR, St0,G9, H9)

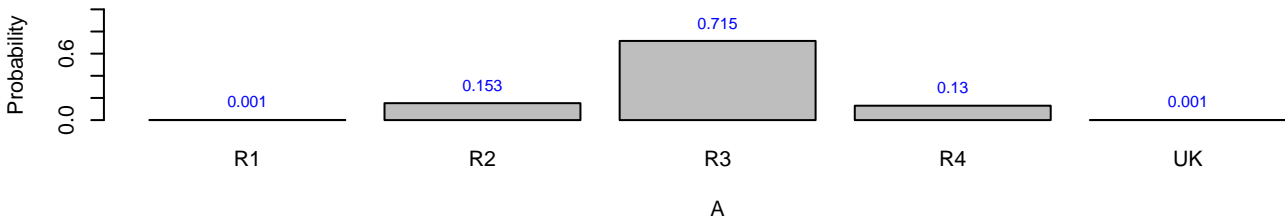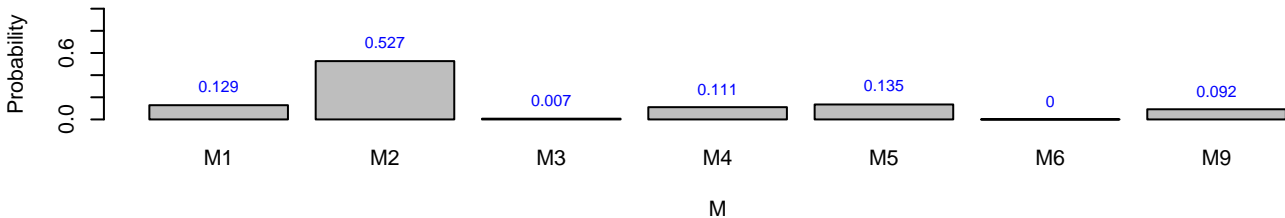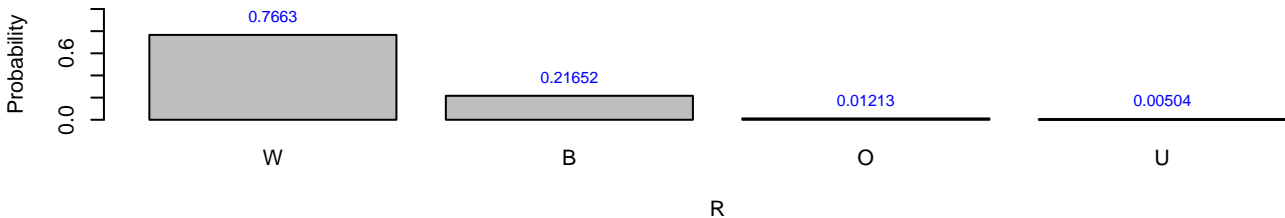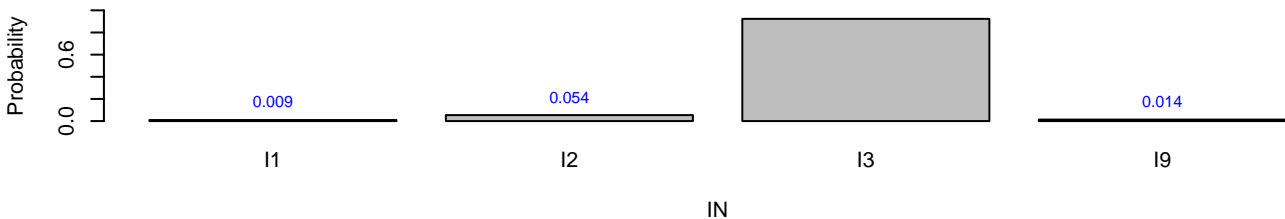

# Setting Treatment, Stage, G, Histology, Age (BCS, St0,G9, H9, A2)

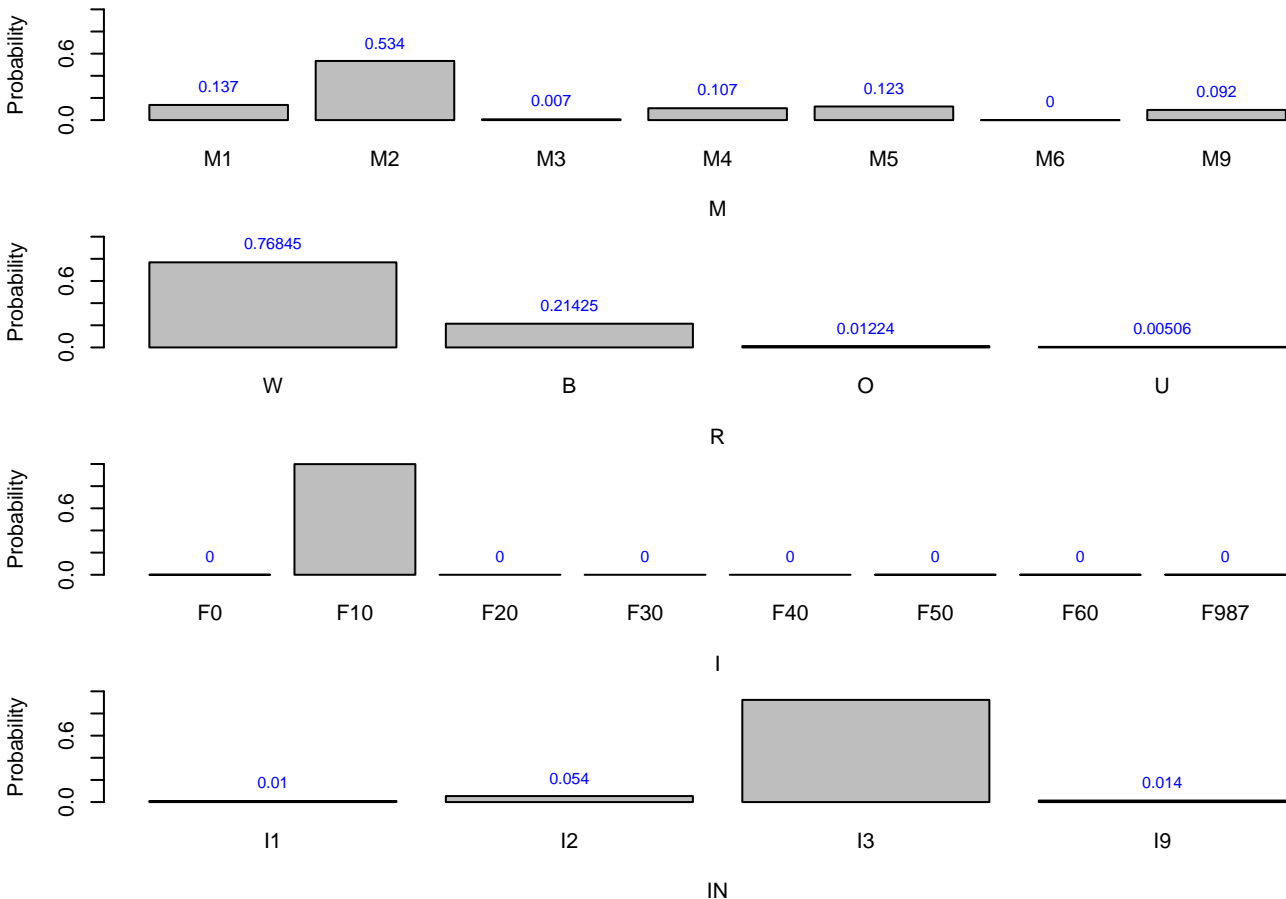



# Setting Treatment, Stage, G, Histology, Age (BCSR, St0,G9, H9, A2)

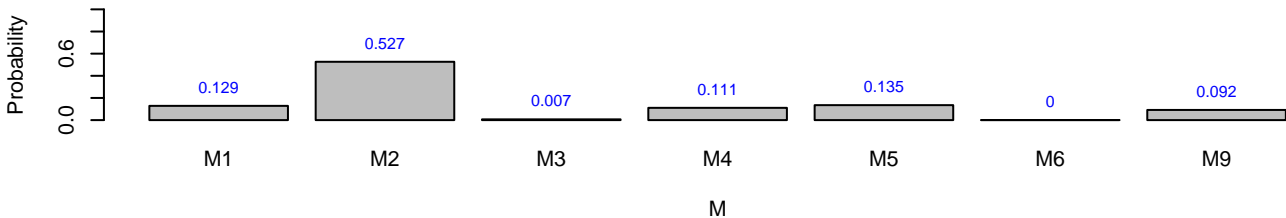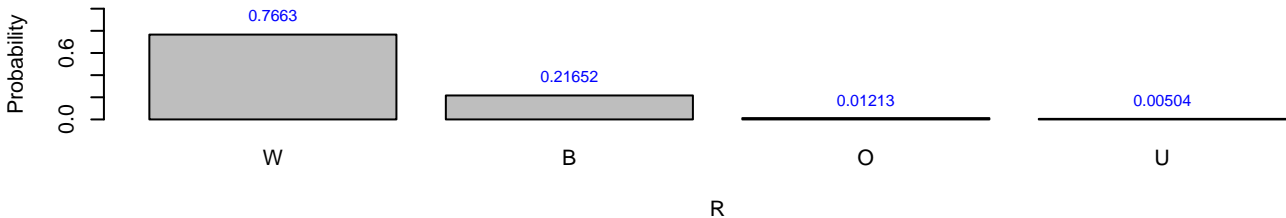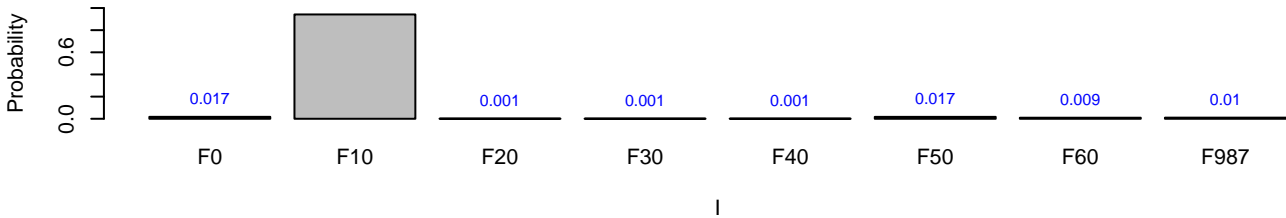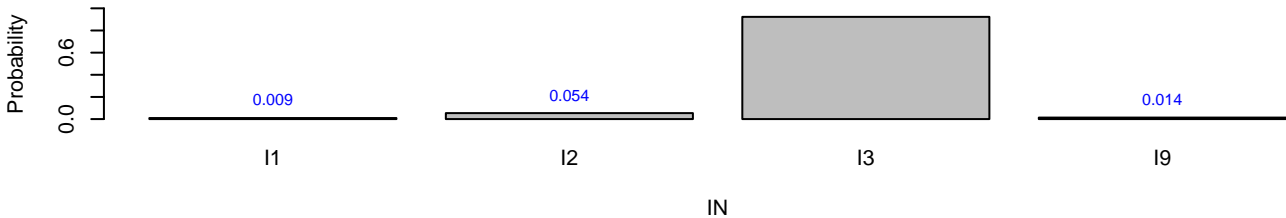

# Setting Treatment, Stage, Age (BCS,Stage 1, R3)

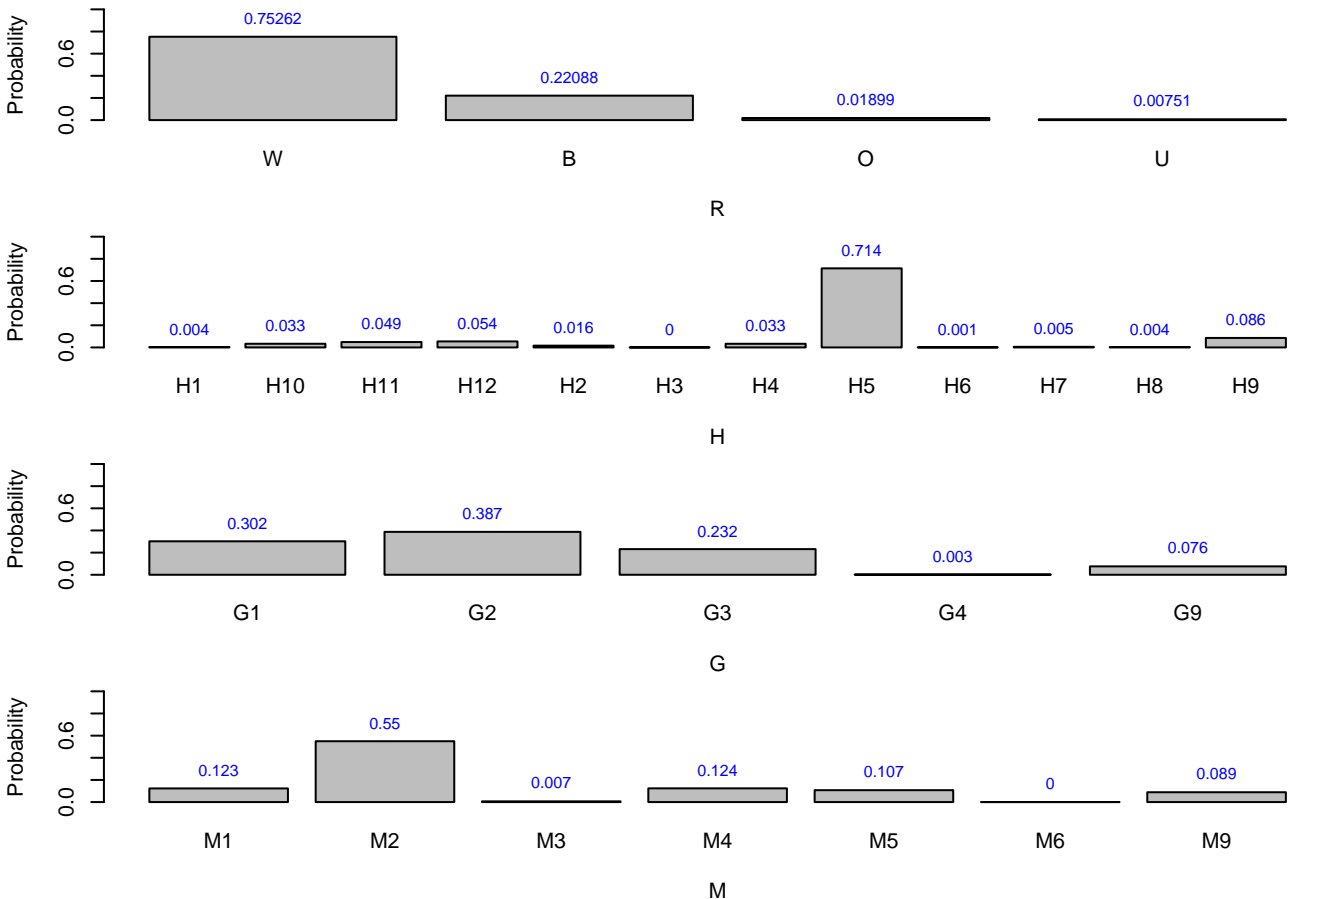

# Setting Treatment, Stage, Age (BCSR, Stage 1, R3)

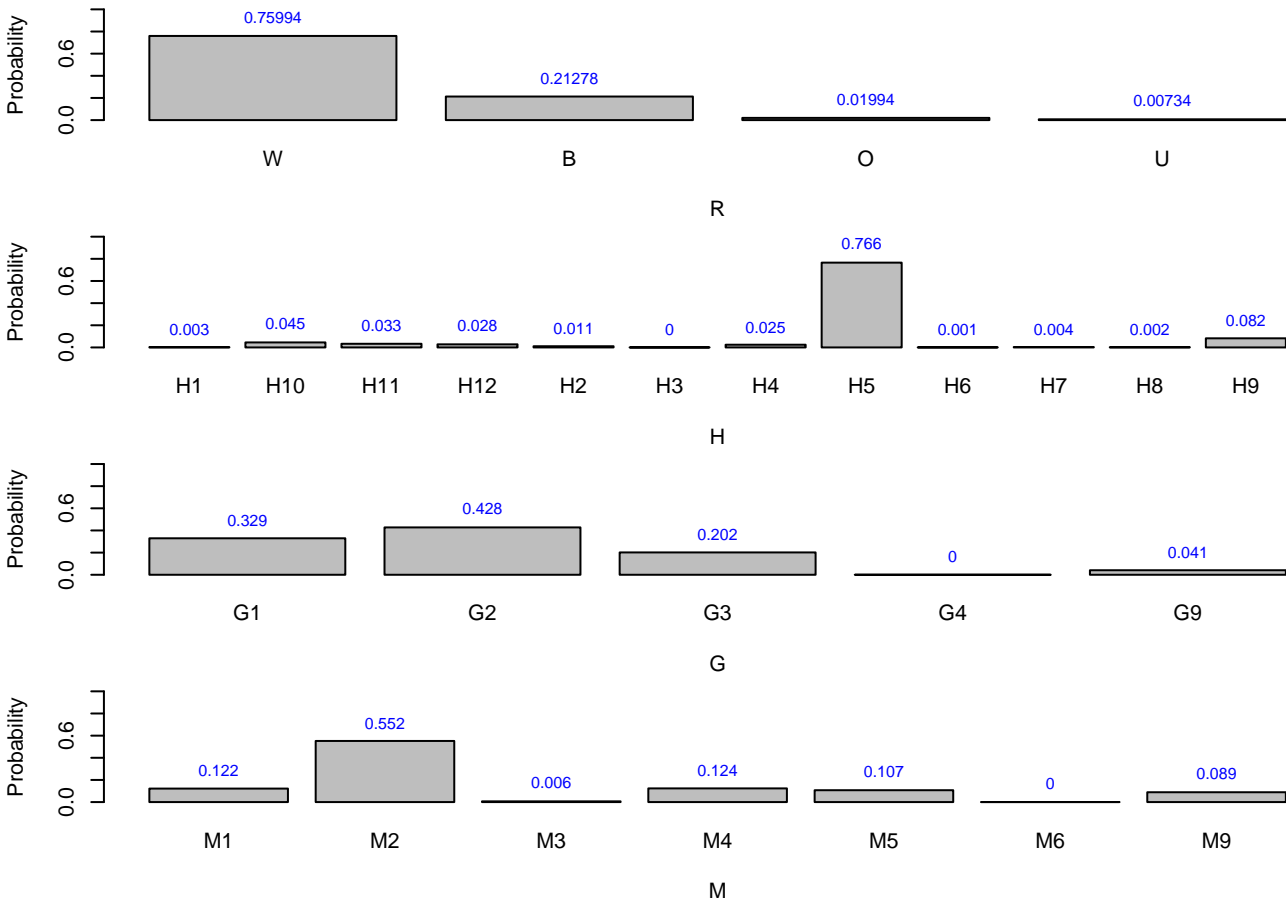

# Setting Treatment, Stage, Age (BCS,Stage 2A, R3)

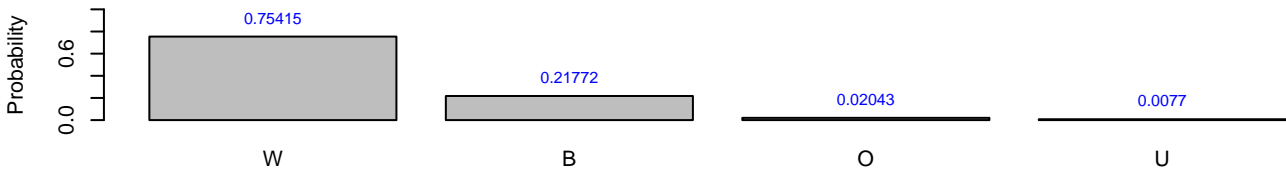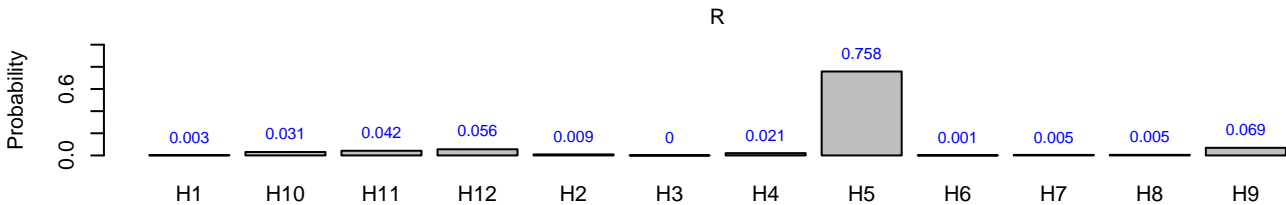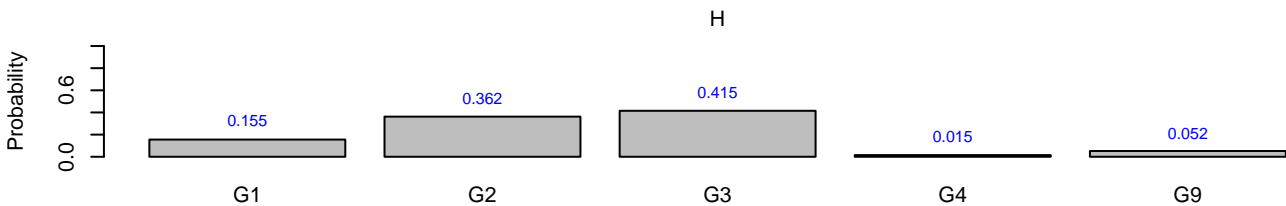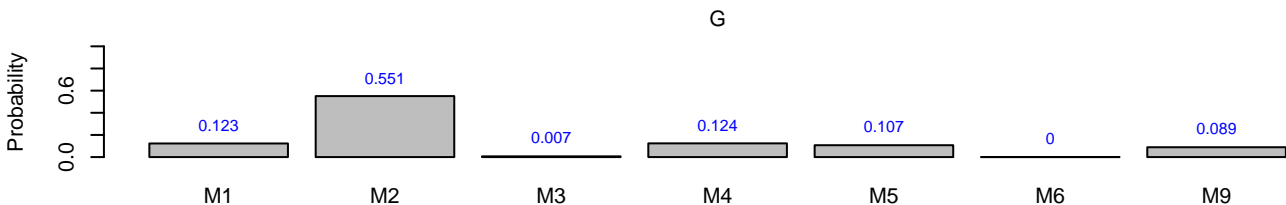

M

# Setting Treatment, Stage, Age (BCSR,Stage 2A, R3)

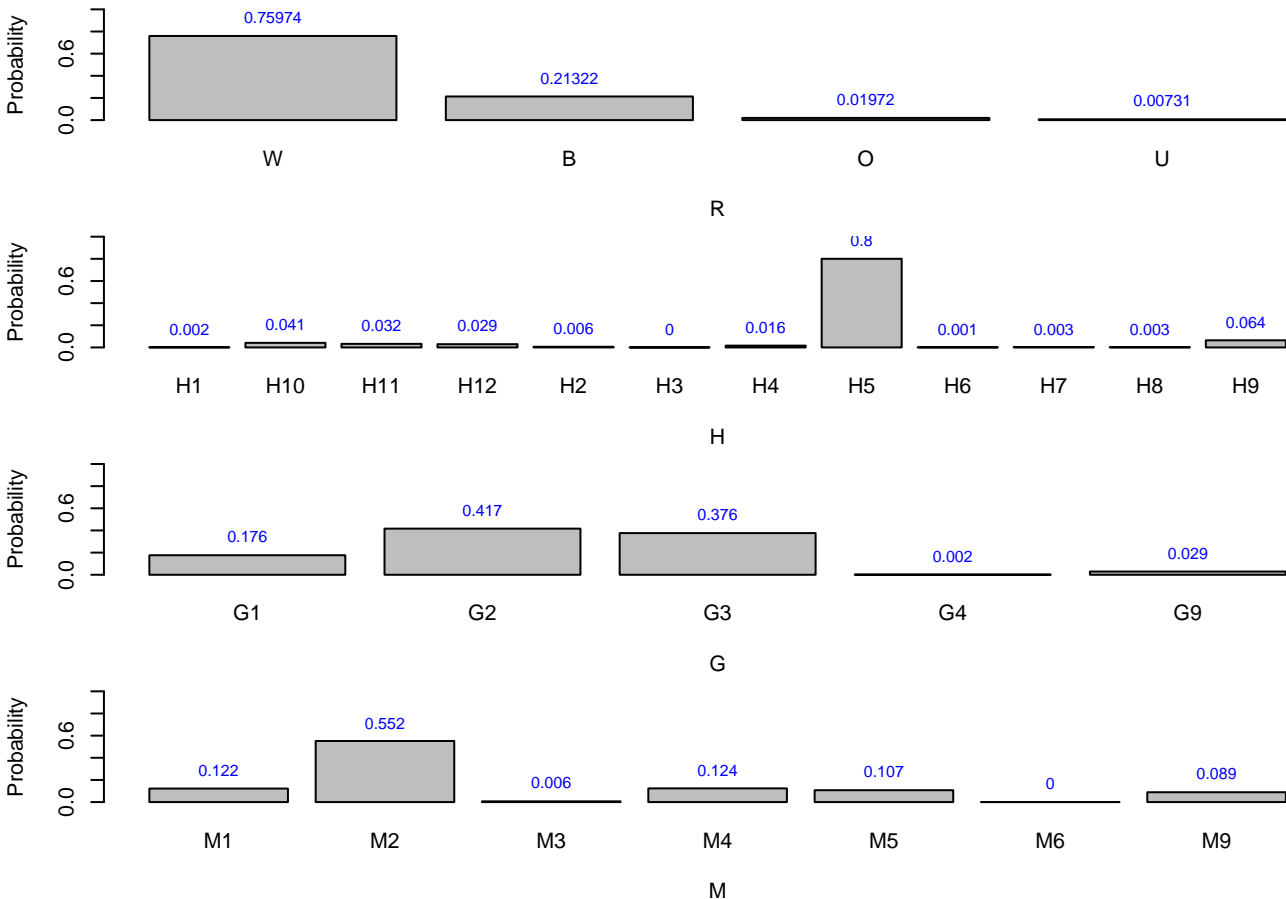

# Setting Treatment, Stage, Age (BCS,Stage 2B, R3)

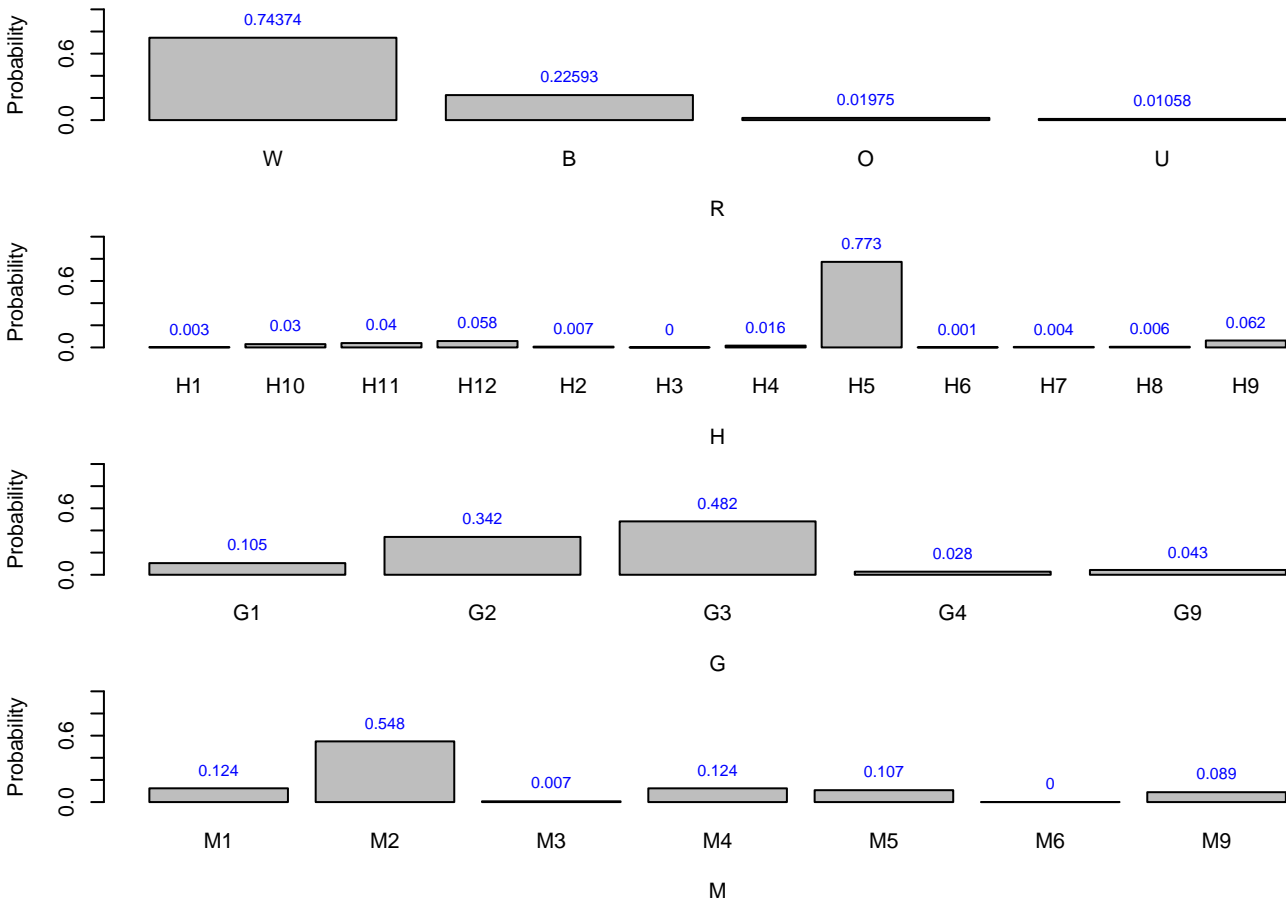

# Setting Treatment, Stage, Age (BCSR,Stage 2B, R3)

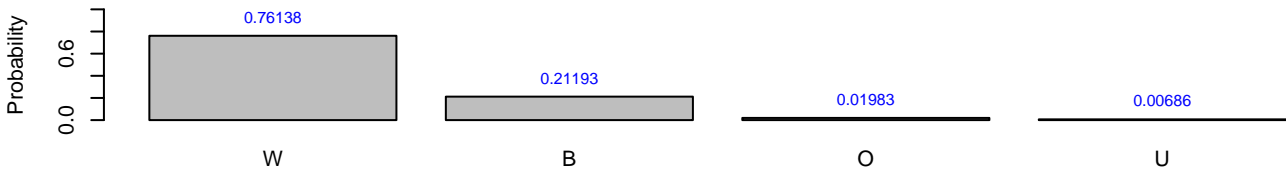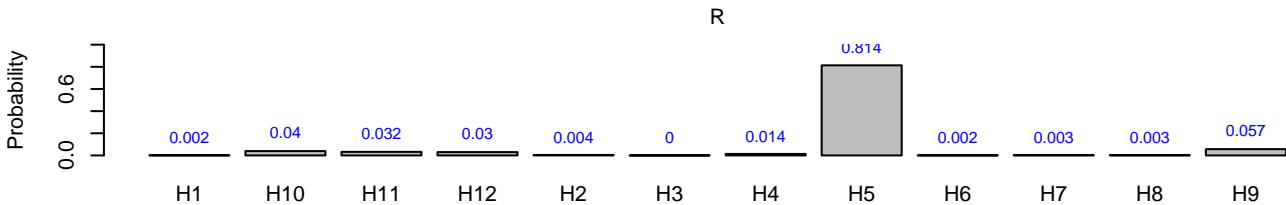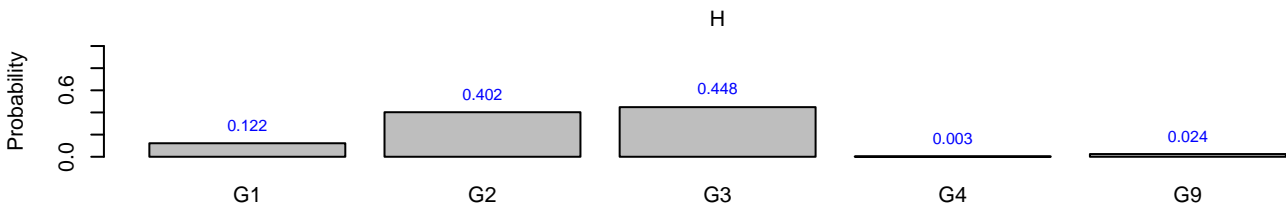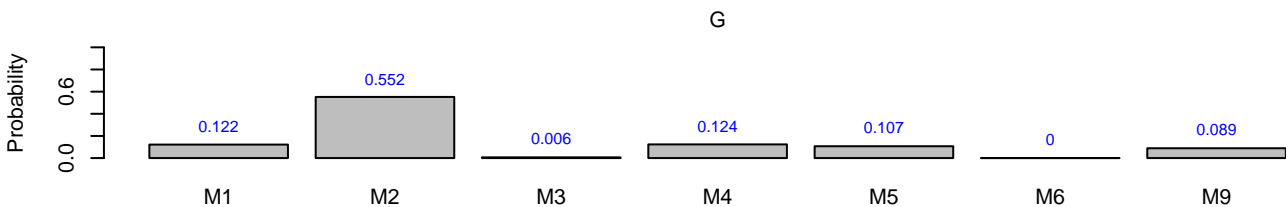

M

# Setting Treatment, Stage, Age, Grade (BCS,Stage 1 ,R4, G2)

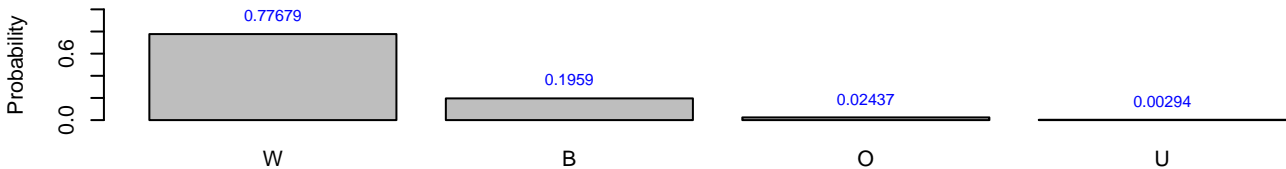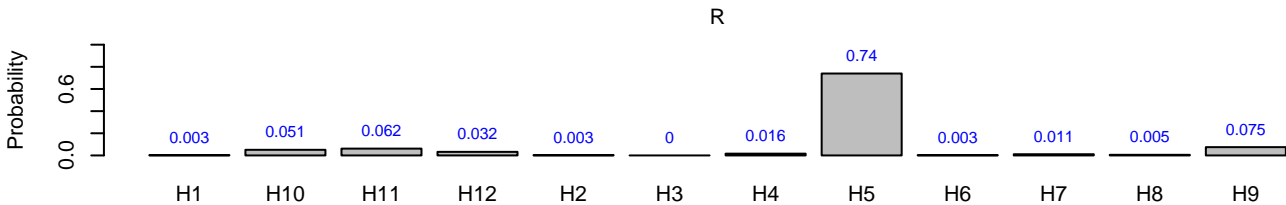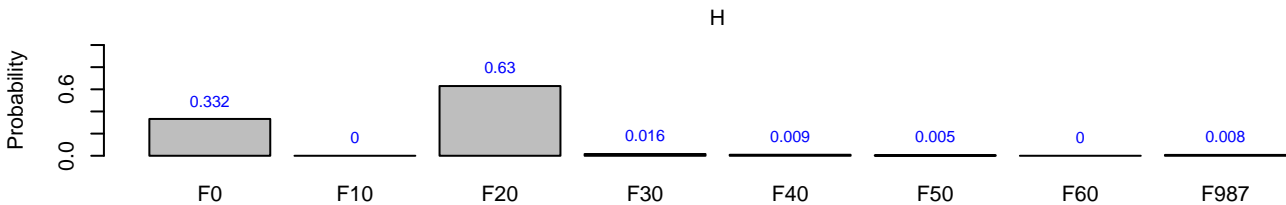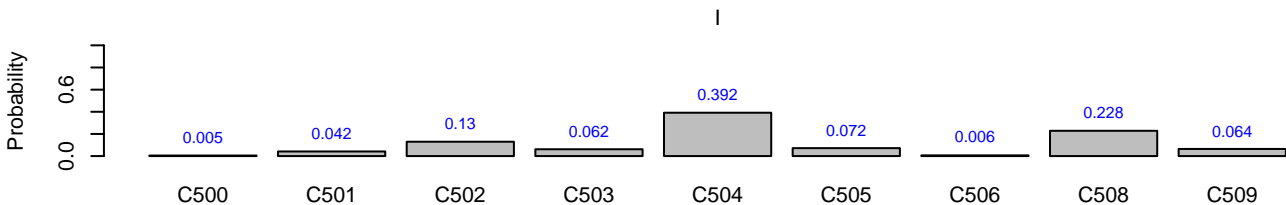

P



# Setting Treatment, Stage, Age, Grade (BCSR,Stage 1 ,R4, G2)

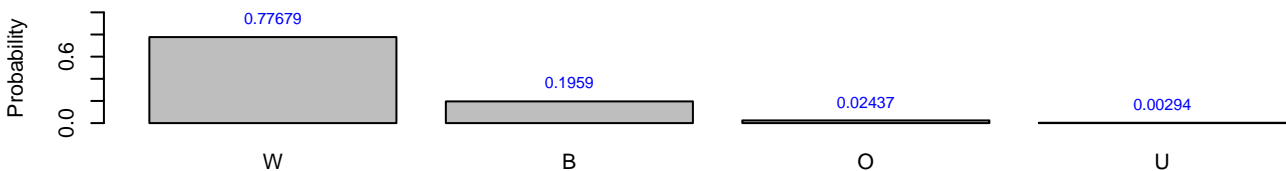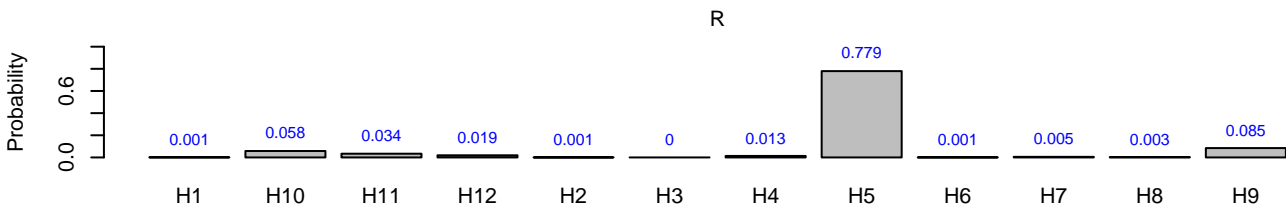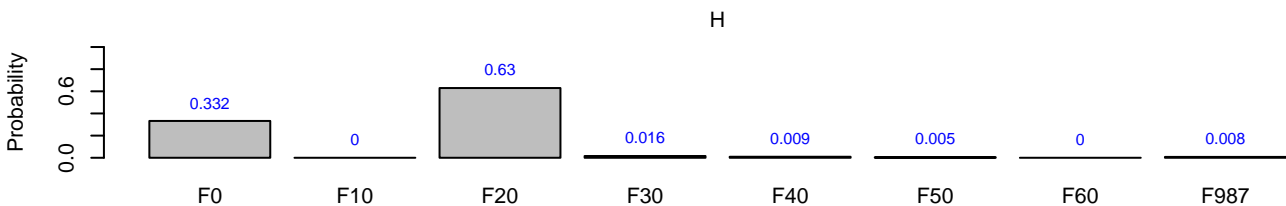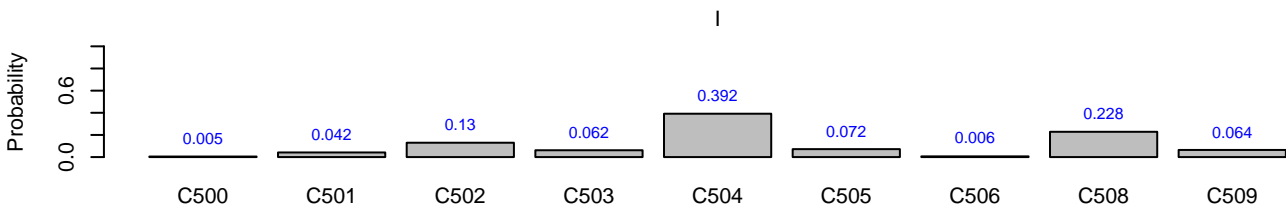

P

# Setting Treatment, Stage, Age, Grade (BCS,Stage 2A ,R4, G2)

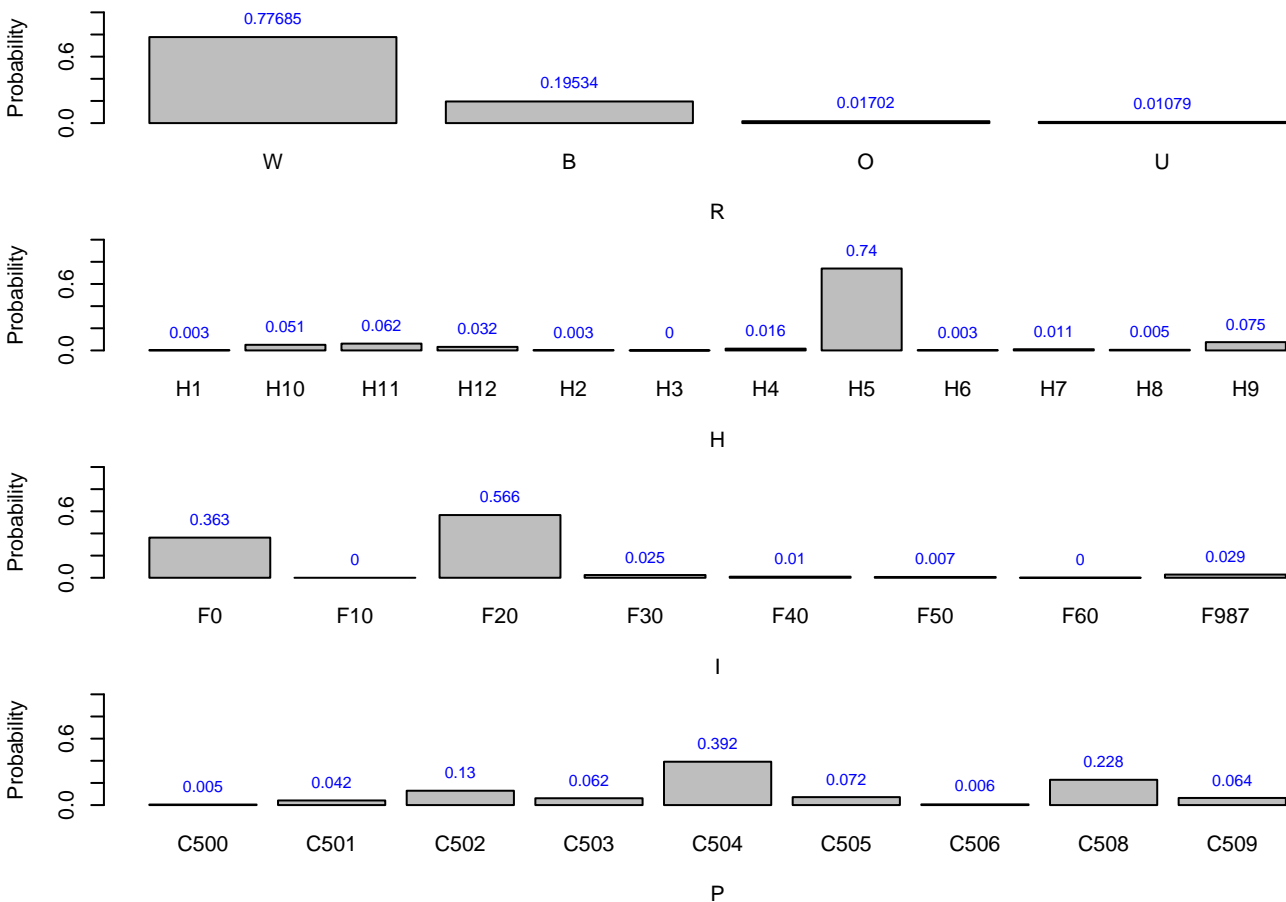

# Setting Treatment, Stage, Age, Grade (BCSR,Stage 2A ,R4, G2)

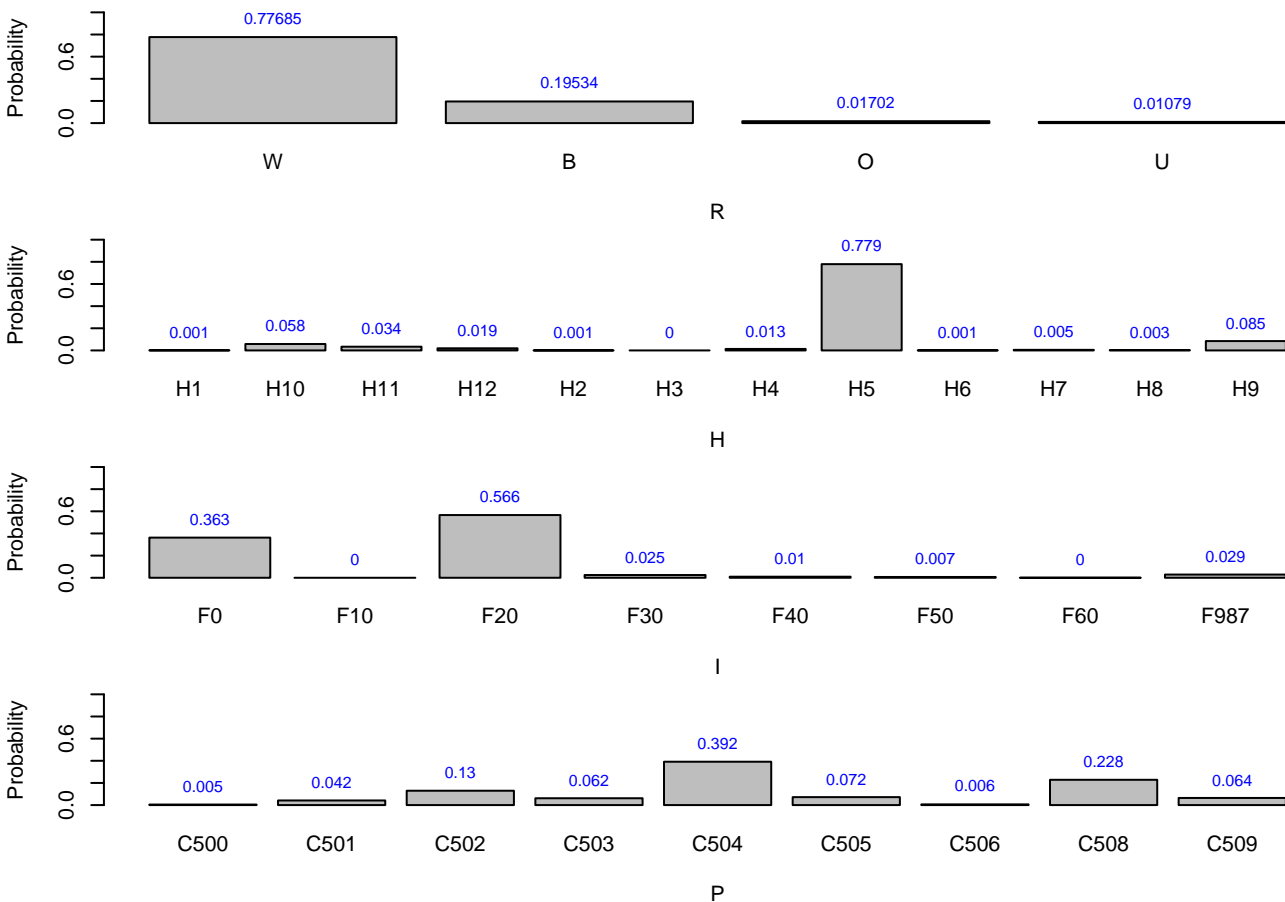

# Setting Treatment, Stage, Age, Grade (BCS,Stage 2B ,R4, G2)

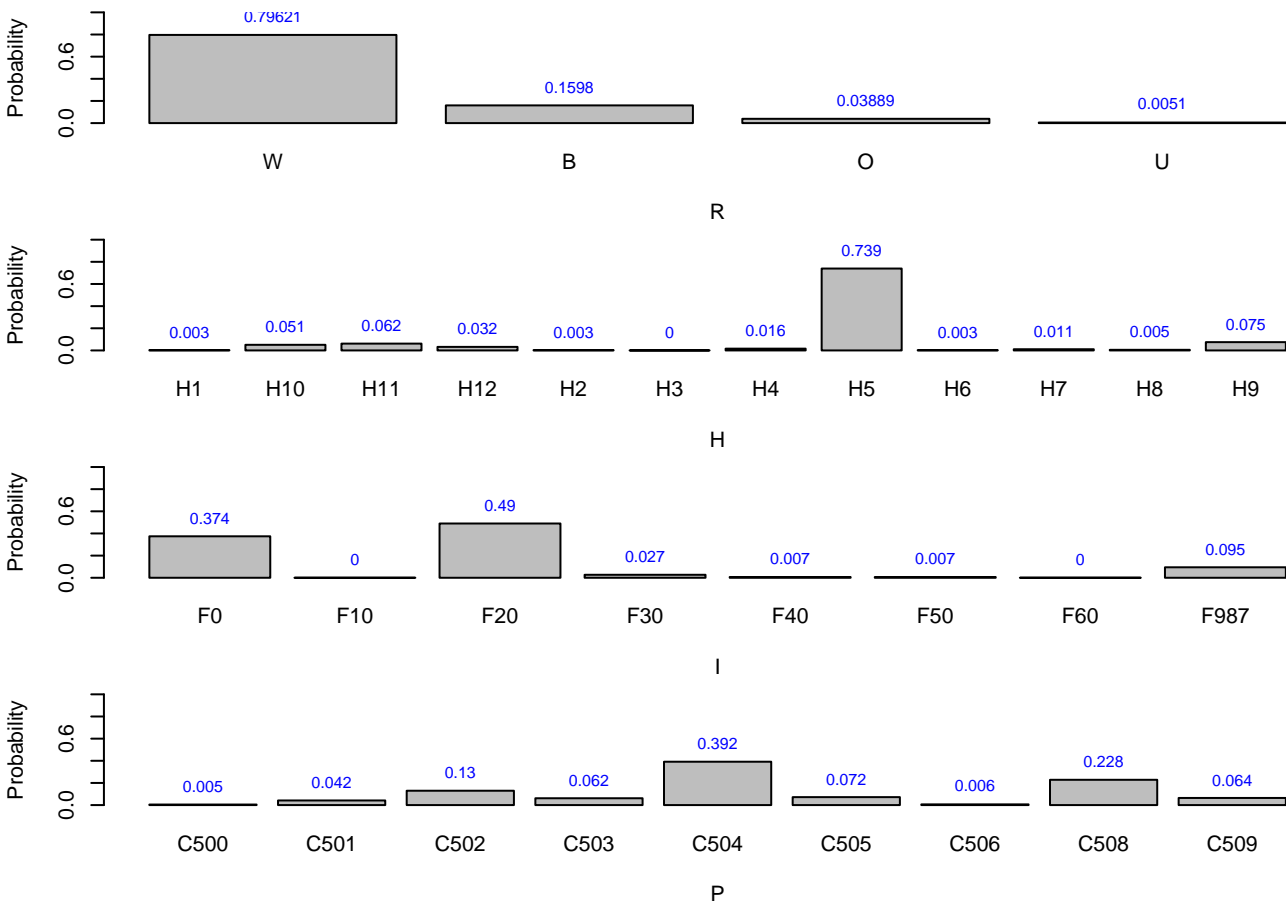

# Setting Treatment, Stage, Age, Grade (BCSR,Stage 2B ,R4, G2)

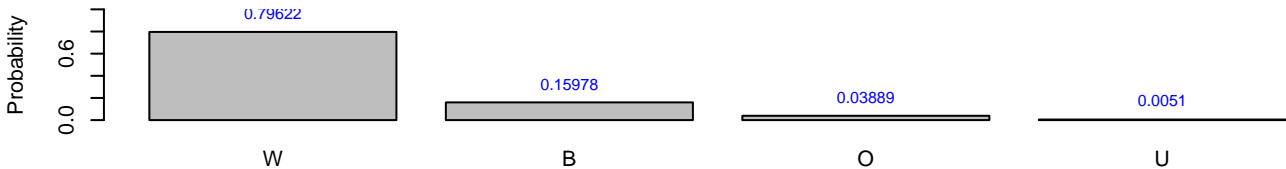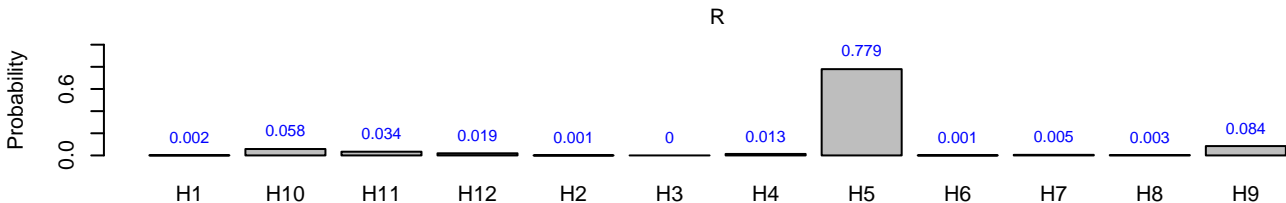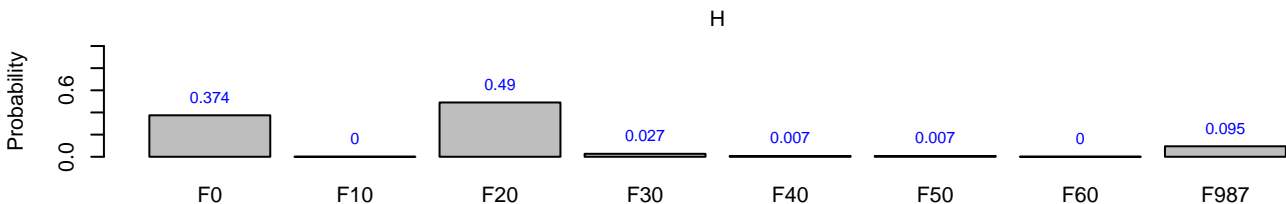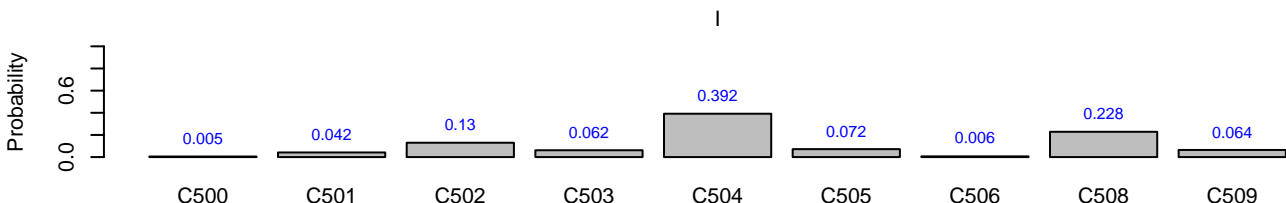

P

## Section 2

### Logistic Regression

Call:

NULL

Deviance Residuals:

| Min     | 1Q     | Median | 3Q     | Max    |
|---------|--------|--------|--------|--------|
| -1.4046 | 0.1584 | 0.2097 | 0.2999 | 1.3922 |

Coefficients: (2 not defined because of singularities)

|             | Estimate  | Std. Error | z value | Pr(> z )     |
|-------------|-----------|------------|---------|--------------|
| (Intercept) | 2.767556  | 2.609521   | 1.061   | 0.2889       |
| MM2         | 0.069165  | 0.095495   | 0.724   | 0.4689       |
| MM3         | 0.033588  | 0.064824   | 0.518   | 0.6044       |
| MM4         | 0.022406  | 0.077323   | 0.290   | 0.7720       |
| MM5         | -0.050714 | 0.079458   | -0.638  | 0.5233       |
| MM6         | 0.148644  | 17.358899  | 0.009   | 0.9932       |
| MM9         | -0.024786 | 0.072639   | -0.341  | 0.7329       |
| Yy2008      | 0.049027  | 0.072171   | 0.679   | 0.4969       |
| Yy2009      | 0.134075  | 0.074285   | 1.805   | 0.0711 .     |
| Yy2010      | 0.130519  | 0.075475   | 1.729   | 0.0838 .     |
| Yy2011      | 0.112847  | 0.075715   | 1.490   | 0.1361       |
| Yy2012      | 0.144490  | 0.078155   | 1.849   | 0.0645 .     |
| PC501       | 0.068045  | 0.153239   | 0.444   | 0.6570       |
| PC502       | 0.074363  | 0.218694   | 0.340   | 0.7338       |
| PC503       | 0.114347  | 0.167341   | 0.683   | 0.4944       |
| PC504       | 0.235622  | 0.322957   | 0.730   | 0.4656       |
| PC505       | 0.142801  | 0.180380   | 0.792   | 0.4286       |
| PC506       | -0.001869 | 0.072339   | -0.026  | 0.9794       |
| PC508       | 0.160588  | 0.278224   | 0.577   | 0.5638       |
| PC509       | 0.020948  | 0.187138   | 0.112   | 0.9109       |
| GG2         | 0.071793  | 0.079256   | 0.906   | 0.3650       |
| GG3         | 0.056298  | 0.083707   | 0.673   | 0.5012       |
| GG4         | 0.019441  | 0.057203   | 0.340   | 0.7340       |
| GG9         | -0.334443 | 0.059836   | -5.589  | 2.28e-08 *** |
| IF10        | -6.783328 | 303.457327 | -0.022  | 0.9822       |
| IF20        | 0.036738  | 0.078946   | 0.465   | 0.6417       |
| IF30        | 0.020570  | 0.067220   | 0.306   | 0.7596       |
| IF40        | 0.003882  | 0.065634   | 0.059   | 0.9528       |
| IF50        | -0.026574 | 0.055901   | -0.475  | 0.6345       |
| IF60        | -0.331083 | 30.509129  | -0.011  | 0.9913       |
| IF987       | 0.071001  | 0.073618   | 0.964   | 0.3348       |
| SSt1        | -7.001996 | 336.707539 | -0.021  | 0.9834       |
| SSt2A       | -5.623832 | 263.658326 | -0.021  | 0.9830       |
| SSt2B       | -3.597776 | 167.573090 | -0.021  | 0.9829       |
| WNR2        | -1.622300 | 28.160115  | -0.058  | 0.9541       |
| BB3         | NA        | NA         | NA      | NA           |
| RB          | -0.039997 | 0.060442   | -0.662  | 0.5081       |
| RO          | -0.009470 | 0.065555   | -0.144  | 0.8851       |
| RU          | 0.032826  | 0.061658   | 0.532   | 0.5945       |
| INI2        | -0.078053 | 0.157657   | -0.495  | 0.6205       |
| INI3        | 0.014292  | 0.176068   | 0.081   | 0.9353       |
| INI9        | -0.035418 | 0.090939   | -0.389  | 0.6969       |

|       |           |           |        |              |
|-------|-----------|-----------|--------|--------------|
| AR2   | 0.301660  | 0.914998  | 0.330  | 0.7416       |
| AR3   | 0.365690  | 1.115141  | 0.328  | 0.7430       |
| AR4   | -0.168549 | 0.883965  | -0.191 | 0.8488       |
| AUK   | NA        | NA        | NA     | NA           |
| HH10  | -0.009579 | 0.086964  | -0.110 | 0.9123       |
| HH11  | 0.058009  | 0.101371  | 0.572  | 0.5672       |
| HH12  | -0.135148 | 0.072142  | -1.873 | 0.0610 .     |
| HH2   | -0.098420 | 0.058485  | -1.683 | 0.0924 .     |
| HH3   | 0.073713  | 0.079001  | 0.933  | 0.3508       |
| HH4   | -0.056806 | 0.069848  | -0.813 | 0.4161       |
| HH5   | -0.180672 | 0.154690  | -1.168 | 0.2428       |
| HH6   | 0.090802  | 0.080501  | 1.128  | 0.2593       |
| HH7   | 0.005665  | 0.060765  | 0.093  | 0.9257       |
| HH8   | -0.018538 | 0.056336  | -0.329 | 0.7421       |
| HH9   | -0.456152 | 0.101515  | -4.493 | 7.01e-06 *** |
| TSS1  | 0.095230  | 0.087257  | 1.091  | 0.2751       |
| TSS10 | -0.017294 | 0.052464  | -0.330 | 0.7417       |
| TSS11 | -0.015296 | 0.047928  | -0.319 | 0.7496       |
| TSS12 | -0.025793 | 0.042182  | -0.611 | 0.5409       |
| TSS13 | -0.015164 | 0.043501  | -0.349 | 0.7274       |
| TSS14 | -0.071321 | 0.040083  | -1.779 | 0.0752 .     |
| TSS15 | 0.206526  | 17.318608 | 0.012  | 0.9905       |
| TSS16 | -0.038489 | 0.042228  | -0.911 | 0.3621       |
| TSS17 | 0.009088  | 0.055857  | 0.163  | 0.8708       |
| TSS2  | 0.052911  | 0.087882  | 0.602  | 0.5471       |
| TSS21 | -0.146772 | 0.060878  | -2.411 | 0.0159 *     |
| TSS3  | 0.048246  | 0.081895  | 0.589  | 0.5558       |
| TSS4  | -0.026054 | 0.078237  | -0.333 | 0.7391       |
| TSS5  | 0.003632  | 0.070257  | 0.052  | 0.9588       |
| TSS6  | -0.036249 | 0.062165  | -0.583 | 0.5598       |
| TSS7  | -0.006259 | 0.063786  | -0.098 | 0.9218       |
| TSS8  | -0.056153 | 0.052160  | -1.077 | 0.2817       |
| TSS9  | -0.059533 | 0.048116  | -1.237 | 0.2160       |

---  
 Signif. codes: 0 '\*\*\*' 0.001 '\*\*' 0.01 '\*' 0.05 '.' 0.1 ' ' 1

(Dispersion parameter for binomial family taken to be 1)

Null deviance: 2707.3 on 8216 degrees of freedom  
 Residual deviance: 2224.2 on 8144 degrees of freedom  
 AIC: 926.76

Number of Fisher Scoring iterations: 14

-----

## glm variable importance

only 20 most important variables shown (out of 72)

|        | Overall |
|--------|---------|
| GG9    | 100.00  |
| HH9    | 80.36   |
| TSS21  | 43.05   |
| HH12   | 33.41   |
| Yy2012 | 32.97   |
| Yy2009 | 32.19   |
| TSS14  | 31.73   |
| Yy2010 | 30.83   |
| HH2    | 30.00   |
| Yy2011 | 26.55   |
| TSS9   | 22.02   |
| HH5    | 20.77   |
| HH6    | 20.06   |
| TSS1   | 19.40   |
| TSS8   | 19.14   |
| IF987  | 17.13   |
| HH3    | 16.57   |
| TSS16  | 16.18   |
| GG2    | 16.08   |
| HH4    | 14.42   |

## Confidence Intervals 95%

| CI Levels   | OR    | Lower Interval | Upper Interval |
|-------------|-------|----------------|----------------|
| (Intercept) | 15.92 | 15.719         | 16.103         |
| MM2         | 1.072 | 0.885          | 1.287          |
| MM3         | 1.034 | 0.928          | 1.211          |
| MM4         | 1.023 | 0.88           | 1.192          |
| MM5         | 0.951 | 0.812          | 1.11           |
| MM6         | 1.16  | 0.026          | NA             |
| MM9         | 0.976 | 0.846          | 1.126          |
| Yy2008      | 1.05  | 0.912          | 1.211          |
| Yy2009      | 1.143 | 0.989          | 1.324          |
| Yy2010      | 1.139 | 0.983          | 1.323          |
| Yy2011      | 1.119 | 0.965          | 1.3            |
| Yy2012      | 1.155 | 0.992          | 1.348          |
| PC501       | 1.07  | 0.766          | 1.414          |
| PC502       | 1.077 | 0.665          | 1.595          |
| PC503       | 1.121 | 0.778          | 1.519          |
| PC504       | 1.266 | 0.617          | 2.25           |
| PC505       | 1.154 | 0.777          | 1.6            |
| PC506       | 0.998 | 0.869          | 1.172          |
| PC508       | 1.174 | 0.633          | 1.929          |



|       |       |       |          |
|-------|-------|-------|----------|
| PC509 | 1.021 | 0.675 | 1.429    |
| GG2   | 1.074 | 0.918 | 1.254    |
| GG3   | 1.058 | 0.898 | 1.247    |
| GG4   | 1.02  | 0.929 | 1.184    |
| GG9   | 0.716 | 0.637 | 0.805    |
| IF10  | 0.001 | NA    | 8.13E+11 |
| IF20  | 1.037 | 0.887 | 1.21     |
| IF30  | 1.021 | 0.908 | 1.191    |
| IF40  | 1.004 | 0.902 | 1.187    |
| IF50  | 0.974 | 0.885 | 1.112    |
| IF60  | 0.718 | 0     | 0        |
| IF987 | 1.074 | 0.944 | 1.268    |
| SSt1  | 0.001 | NA    | 2.76E+13 |
| SSt2A | 0.004 | NA    | 2.89E+10 |
| SSt2B | 0.027 | NA    | 4268919  |
| WNR2  | 0.197 | NA    | 1.294    |
| BB3   | NA    | NA    | NA       |
| RB    | 0.961 | 0.855 | 1.084    |
| RO    | 0.991 | 0.883 | 1.146    |
| RU    | 1.033 | 0.93  | 1.193    |
| INI2  | 0.925 | 0.644 | 1.219    |
| INI3  | 1.014 | 0.672 | 1.369    |
| INI9  | 0.965 | 0.792 | 1.143    |
| AR2   | 1.352 | 0.025 | 4.841    |
| AR3   | 1.442 | 0.011 | 6.808    |
| AR4   | 0.845 | 0.018 | 2.897    |
| AUK   | NA    | NA    | NA       |
| HH10  | 0.99  | 0.837 | 1.18     |
| HH11  | 1.06  | 0.862 | 1.286    |
| HH12  | 0.874 | 0.759 | 1.008    |
| HH2   | 0.906 | 0.815 | 1.032    |
| HH3   | 1.076 | 0.929 | 1.275    |
| HH4   | 0.945 | 0.828 | 1.093    |
| HH5   | 0.835 | 0.607 | 1.116    |
| HH6   | 1.095 | 0.942 | 1.299    |
| HH7   | 1.006 | 0.901 | 1.152    |
| HH8   | 0.982 | 0.886 | 1.111    |
| HH9   | 0.634 | 0.515 | 0.768    |
| TSS1  | 1.1   | 0.926 | 1.304    |
| TSS10 | 0.983 | 0.902 | 1.128    |
| TSS11 | 0.985 | 0.909 | 1.12     |

|       |       |       |       |
|-------|-------|-------|-------|
| TSS12 | 0.975 | 0.902 | 1.081 |
| TSS13 | 0.985 | 0.917 | 1.132 |
| TSS14 | 0.931 | 0.859 | 1.021 |
| TSS15 | 1.229 | 0.059 | NA    |
| TSS16 | 0.962 | 0.896 | 1.082 |
| TSS17 | 1.009 | 0.936 | 1.292 |
| TSS2  | 1.054 | 0.887 | 1.252 |
| TSS21 | 0.863 | 0.766 | 0.973 |
| TSS3  | 1.049 | 0.895 | 1.235 |
| TSS4  | 0.974 | 0.837 | 1.139 |
| TSS5  | 1.004 | 0.877 | 1.156 |
| TSS6  | 0.964 | 0.859 | 1.099 |
| TSS7  | 0.994 | 0.888 | 1.149 |
| TSS8  | 0.945 | 0.859 | 1.058 |
| TSS9  | 0.942 | 0.864 | 1.05  |

## Section 3

### Validation Results

Where: T1 = BCS; T2 = BCSR

#### Bayesian Network

##### Confusion Matrix and Statistics

|            | Reference |      |
|------------|-----------|------|
| Prediction | T1        | T2   |
| T1         | 253       | 539  |
| T2         | 33        | 2694 |

Accuracy : 0.8375  
95% CI : (0.8248, 0.8495)  
No Information Rate : 0.9187  
P-Value [Acc > NIR] : 1

Kappa : 0.3974  
McNemar's Test P-Value : <2e-16

Sensitivity : 0.88462  
Specificity : 0.83328  
Pos Pred Value : 0.31944  
Neg Pred Value : 0.98790  
Prevalence : 0.08127  
Detection Rate : 0.07190  
Detection Prevalence : 0.22506  
Balanced Accuracy : 0.85895

'Positive' Class : T1

#### Logistic Regression

##### Confusion Matrix and Statistics

|            | Reference |      |
|------------|-----------|------|
| Prediction | T1        | T2   |
| T1         | 165       | 627  |
| T2         | 10        | 2717 |

Accuracy : 0.819  
95% CI : (0.8059, 0.8316)  
No Information Rate : 0.9503  
P-Value [Acc > NIR] : 1

Kappa : 0.2828  
McNemar's Test P-Value : <2e-16

Sensitivity : 0.94286  
Specificity : 0.81250  
Pos Pred Value : 0.20833  
Neg Pred Value : 0.99633  
Prevalence : 0.04973  
Detection Rate : 0.04689  
Detection Prevalence : 0.22506  
Balanced Accuracy : 0.87768

'Positive' Class : T1

## Section 4

### Logistic Regression San Francisco-Oakland

Call:  
NULL

Deviance Residuals:

| Min     | 1Q      | Median | 3Q     | Max    |
|---------|---------|--------|--------|--------|
| -1.4515 | -0.4910 | 0.3129 | 0.4135 | 1.6417 |

Coefficients:

|             | Estimate   | Std. Error | z value | Pr(> z ) |     |
|-------------|------------|------------|---------|----------|-----|
| (Intercept) | 1.598e+00  | 5.927e+00  | 0.270   | 0.787434 |     |
| MM2         | 5.162e-02  | 5.920e-02  | 0.872   | 0.383230 |     |
| MM3         | 9.245e-03  | 4.389e-02  | 0.211   | 0.833160 |     |
| MM4         | 8.759e-02  | 5.314e-02  | 1.649   | 0.099243 | .   |
| MM5         | -3.595e-02 | 5.302e-02  | -0.678  | 0.497713 |     |
| MM6         | 4.249e-02  | 7.029e-02  | 0.604   | 0.545520 |     |
| MM9         | 2.637e-02  | 4.627e-02  | 0.570   | 0.568752 |     |
| Yy2008      | -1.742e-02 | 5.425e-02  | -0.321  | 0.748160 |     |
| Yy2009      | -3.040e-02 | 5.439e-02  | -0.559  | 0.576146 |     |
| Yy2010      | 5.261e-03  | 5.572e-02  | 0.094   | 0.924771 |     |
| Yy2011      | -2.028e-02 | 5.653e-02  | -0.359  | 0.719773 |     |
| Yy2012      | -7.622e-02 | 5.449e-02  | -1.399  | 0.161863 |     |
| PC501       | -1.487e-02 | 1.218e-01  | -0.122  | 0.902838 |     |
| PC502       | 3.688e-02  | 2.069e-01  | 0.178   | 0.858524 |     |
| PC503       | 2.698e-02  | 1.484e-01  | 0.182   | 0.855728 |     |
| PC504       | 4.254e-02  | 2.889e-01  | 0.147   | 0.882931 |     |
| PC505       | -2.196e-02 | 1.648e-01  | -0.133  | 0.893979 |     |
| PC506       | 3.823e-02  | 6.309e-02  | 0.606   | 0.544572 |     |
| PC508       | 2.555e-02  | 2.487e-01  | 0.103   | 0.918179 |     |
| PC509       | -7.498e-02 | 1.477e-01  | -0.508  | 0.611769 |     |
| GG2         | -1.420e-02 | 5.527e-02  | -0.257  | 0.797182 |     |
| GG3         | 5.756e-02  | 5.709e-02  | 1.008   | 0.313349 |     |
| GG4         | 5.759e-02  | 4.509e-02  | 1.277   | 0.201517 |     |
| GG9         | -1.953e-01 | 4.189e-02  | -4.662  | 3.13e-06 | *** |
| IF10        | -7.522e+00 | 1.186e+03  | -0.006  | 0.994940 |     |
| IF20        | 1.144e-01  | 5.736e-02  | 1.994   | 0.046184 | *   |
| IF30        | -4.565e-03 | 4.836e-02  | -0.094  | 0.924789 |     |
| IF40        | -4.370e-02 | 4.050e-02  | -1.079  | 0.280524 |     |
| IF50        | -2.716e-02 | 4.529e-02  | -0.600  | 0.548764 |     |
| IF60        | 7.924e-03  | 5.551e+01  | 0.000   | 0.999886 |     |
| IF987       | -4.226e+02 | 3.693e-02  | -1.145  | 0.252414 |     |
| SSt1        | 9.431e+00  | 1.936e+03  | 0.005   | 0.996112 |     |
| SSt2A       | 7.164e+00  | 1.496e+03  | 0.005   | 0.996179 |     |
| SSt2B       | 4.437e+00  | 9.307e+02  | 0.005   | 0.996196 |     |
| WNR2        | -2.779e+00 | 3.745e+01  | -0.074  | 0.940848 |     |
| BB3         | -1.535e+01 | 2.083e+03  | -0.007  | 0.994119 |     |
| RB          | -7.412e-02 | 4.167e-02  | -1.779  | 0.075270 | .   |
| RO          | 3.470e-02  | 4.444e-02  | 0.781   | 0.434908 |     |
| RU          | -4.580e-02 | 3.719e-02  | -1.232  | 0.218063 |     |
| INI2        | 3.431e-01  | 2.048e-01  | 1.675   | 0.093885 | .   |

|       |            |           |        |          |     |
|-------|------------|-----------|--------|----------|-----|
| INI3  | 3.184e-01  | 2.055e-01 | 1.549  | 0.121330 |     |
| INI9  | 2.334e-02  | 4.831e-02 | 0.483  | 0.629016 |     |
| AR2   | -4.557e-02 | 6.061e-01 | -0.075 | 0.940067 |     |
| AR3   | 3.577e-02  | 7.089e-01 | 0.050  | 0.959756 |     |
| AR4   | -3.606e-01 | 5.296e-01 | -0.681 | 0.495899 |     |
| AUK   | -2.621e-01 | 3.922e+01 | -0.007 | 0.994669 |     |
| HH10  | -1.029e-01 | 7.275e-02 | -1.415 | 0.157169 |     |
| HH11  | -5.170e-02 | 9.630e-02 | -0.537 | 0.591322 |     |
| HH12  | -1.165e-01 | 5.829e-02 | -1.998 | 0.045689 | *   |
| HH2   | -1.930e-02 | 5.538e-02 | -0.349 | 0.727435 |     |
| HH3   | 1.737e-02  | 5.095e-02 | 0.341  | 0.733196 |     |
| HH4   | -3.494e-02 | 5.653e-02 | -0.618 | 0.536480 |     |
| HH5   | -2.202e-01 | 1.378e-01 | -1.598 | 0.110150 |     |
| HH6   | 2.287e-02  | 5.294e-02 | 0.432  | 0.665808 |     |
| HH7   | -3.270e-02 | 4.146e-02 | -0.789 | 0.430388 |     |
| HH8   | -3.768e-02 | 4.089e-02 | -0.922 | 0.356779 |     |
| HH9   | -3.100e-01 | 8.325e-02 | -3.723 | 0.000197 | *** |
| TSS1  | 1.225e-01  | 5.940e-02 | 2.063  | 0.039106 | *   |
| TSS10 | 5.094e-02  | 4.361e-02 | 1.168  | 0.242739 |     |
| TSS11 | 2.489e-02  | 4.012e-02 | 0.620  | 0.534994 |     |
| TSS12 | -1.590e-02 | 3.243e-02 | -0.490 | 0.623884 |     |
| TSS13 | -3.004e-03 | 3.538e-02 | -0.085 | 0.932336 |     |
| TSS14 | 9.833e-03  | 3.185e-02 | 0.309  | 0.757535 |     |
| TSS15 | 4.420e-02  | 5.553e-02 | 0.796  | 0.426002 |     |
| TSS16 | -2.396e-01 | 3.842e+01 | -0.006 | 0.995023 |     |
| TSS17 | 7.836e-03  | 3.702e-02 | 0.212  | 0.832379 |     |
| TSS2  | 1.503e-01  | 6.042e-02 | 2.488  | 0.012841 | *   |
| TSS21 | -2.499e-02 | 4.235e-02 | -0.590 | 0.555141 |     |
| TSS3  | 1.385e-01  | 5.794e-02 | 2.390  | 0.016840 | *   |
| TSS4  | 1.708e-01  | 5.838e-02 | 2.926  | 0.003433 | **  |
| TSS5  | 1.286e-01  | 5.252e-02 | 2.449  | 0.014331 | *   |
| TSS6  | 5.049e-02  | 4.518e-02 | 1.118  | 0.263766 |     |
| TSS7  | 1.098e-01  | 5.092e-02 | 2.156  | 0.031051 | *   |
| TSS8  | 3.478e-02  | 4.152e-02 | 0.838  | 0.402174 |     |
| TSS9  | 9.697e-02  | 5.539e-02 | 1.751  | 0.079994 | .   |

---

Signif. codes: 0 '\*\*\*' 0.001 '\*\*' 0.01 '\*' 0.05 '.' 0.1 ' ' 1

(Dispersion parameter for binomial family taken to be 1)

Null deviance: 4604.2 on 9729 degrees of freedom  
 Residual deviance: 3914.5 on 9655 degrees of freedom  
 AIC: 1914.2

Number of Fisher Scoring iterations: 15

## glm variable importance

|        | Overall |
|--------|---------|
| GG9    | 100.00  |
| HH9    | 79.87   |
| TSS4   | 62.76   |
| TSS2   | 53.37   |
| TSS5   | 52.53   |
| TSS3   | 51.27   |
| TSS7   | 46.26   |
| TSS1   | 44.25   |
| HH12   | 42.86   |
| IF20   | 42.77   |
| RB     | 38.16   |
| TSS9   | 37.55   |
| INI2   | 35.93   |
| MM4    | 35.36   |
| HH5    | 34.27   |
| INI3   | 33.23   |
| HH10   | 30.34   |
| Yy2012 | 30.00   |
| GG4    | 27.40   |
| RU     | 26.42   |

## Section 5

### San Francisco-Oakland Validation Results

T1 = BCS; T2 =BCSR

#### Bayesian Network

Confusion Matrix and Statistics

|            | Reference |      |
|------------|-----------|------|
| Prediction | T1        | T2   |
| T1         | 332       | 911  |
| T2         | 87        | 2836 |

Accuracy : 0.7604  
95% CI : (0.7472, 0.7733)  
No Information Rate : 0.8994  
P-Value [Acc > NIR] : 1

Kappa : 0.2932  
McNemar's Test P-Value : <2e-16

Sensitivity : 0.79236  
Specificity : 0.75687  
Pos Pred Value : 0.26710  
Neg Pred Value : 0.97024  
Prevalence : 0.10058  
Detection Rate : 0.07969  
Detection Prevalence : 0.29837  
Balanced Accuracy : 0.77462

'Positive' Class : T1

#### Logistic Regression

Confusion Matrix and Statistics

|            | Reference |      |
|------------|-----------|------|
| Prediction | T1        | T2   |
| T1         | 244       | 999  |
| T2         | 16        | 2907 |

Accuracy : 0.7564  
95% CI : (0.743, 0.7693)  
No Information Rate : 0.9376  
P-Value [Acc > NIR] : 1

Kappa : 0.2469  
McNemar's Test P-Value : <2e-16

Sensitivity : 0.93846  
Specificity : 0.74424  
Pos Pred Value : 0.19630  
Neg Pred Value : 0.99453  
Prevalence : 0.06241  
Detection Rate : 0.05857  
Detection Prevalence : 0.29837  
Balanced Accuracy : 0.84135

'Positive' Class : T1

## Section 6

### Logistic Regression Atlanta

Call:  
NULL

Deviance Residuals:

| Min     | 1Q     | Median | 3Q     | Max    |
|---------|--------|--------|--------|--------|
| -1.4647 | 0.0000 | 0.2654 | 0.3592 | 1.3985 |

Coefficients:

|             | Estimate   | Std. Error  | z value | Pr(> z )   |     |
|-------------|------------|-------------|---------|------------|-----|
| (Intercept) | 2.0189544  | 14.3513952  | 0.141   | 0.88812    |     |
| MM2         | 0.1078399  | 0.0917869   | 1.175   | 0.24004    |     |
| MM3         | -0.0430897 | 0.0548820   | -0.785  | 0.43238    |     |
| MM4         | 0.0239916  | 0.0780620   | 0.307   | 0.75858    |     |
| MM5         | -0.0489998 | 0.0789751   | -0.620  | 0.53496    |     |
| MM6         | -0.0238757 | 0.0645190   | -0.370  | 0.71134    |     |
| MM9         | -0.0537853 | 0.0594797   | -0.904  | 0.36586    |     |
| Yy2008      | -0.0007928 | 0.0869514   | -0.009  | 0.99273    |     |
| Yy2009      | -0.0021342 | 0.0883807   | -0.024  | 0.98073    |     |
| Yy2010      | -0.2511589 | 0.0803288   | -3.127  | 0.00177    | **  |
| Yy2011      | -0.3611193 | 0.0806398   | -4.478  | 0.00000753 | *** |
| Yy2012      | -0.0865604 | 0.0876093   | -0.988  | 0.32314    |     |
| PC501       | 0.1105761  | 0.1758027   | 0.629   | 0.52936    |     |
| PC502       | 0.1798431  | 0.2786421   | 0.645   | 0.51865    |     |
| PC503       | 0.1282636  | 0.2015242   | 0.636   | 0.52447    |     |
| PC504       | 0.1832537  | 0.3830486   | 0.478   | 0.63236    |     |
| PC505       | 0.0889591  | 0.2133936   | 0.417   | 0.67677    |     |
| PC506       | -0.0217680 | 0.0800558   | -0.272  | 0.78569    |     |
| PC508       | 0.1487771  | 0.3379894   | 0.440   | 0.65980    |     |
| PC509       | -0.0597168 | 0.2069333   | -0.289  | 0.77290    |     |
| GG2         | 0.0398265  | 0.0852811   | 0.467   | 0.64050    |     |
| GG3         | -0.0084892 | 0.0874128   | -0.097  | 0.92263    |     |
| GG4         | 0.0493362  | 0.0882207   | 0.559   | 0.57600    |     |
| GG9         | -0.2611667 | 0.0635589   | -4.109  | 0.00003973 | *** |
| IF10        | 0.6849793  | 0.5963874   | 1.149   | 0.25074    |     |
| IF20        | -0.0445568 | 0.0847281   | -0.526  | 0.59897    |     |
| IF30        | 0.0552940  | 0.0886141   | 0.624   | 0.53264    |     |
| IF40        | 0.0361523  | 0.1095888   | 0.330   | 0.74148    |     |
| IF50        | -0.0059177 | 0.0660479   | -0.090  | 0.92861    |     |
| IF60        | -0.5609199 | 71.8032012  | -0.008  | 0.99377    |     |
| IF987       | 0.1001467  | 0.0780486   | 1.283   | 0.19945    |     |
| SSt1        | -5.4057441 | 270.8565768 | -0.020  | 0.98408    |     |
| SSt2A       | -4.2963259 | 206.6594999 | -0.021  | 0.98341    |     |
| SSt2B       | -2.5562514 | 122.2573229 | -0.021  | 0.98332    |     |
| WNR2        | -3.1839043 | 101.9066306 | -0.031  | 0.97508    |     |
| WUnk        | -0.4492853 | 83.8623004  | -0.005  | 0.99573    |     |
| BB3         | 6.0413700  | 246.2134765 | 0.025   | 0.98042    |     |
| RB          | -0.0366593 | 0.0669146   | -0.548  | 0.58379    |     |
| RO          | -0.0223963 | 0.0630841   | -0.355  | 0.72257    |     |
| RU          | -0.0528441 | 0.0465408   | -1.135  | 0.25619    |     |



|       |            |              |        |            |
|-------|------------|--------------|--------|------------|
| INI2  | 0.0072477  | 0.1136937    | 0.064  | 0.94917    |
| INI3  | 0.1179756  | 0.1204280    | 0.980  | 0.32727    |
| INI9  | -0.0539609 | 0.0619484    | -0.871 | 0.38372    |
| AR2   | 8.2850005  | 2988.9834706 | 0.003  | 0.99779    |
| AR3   | 9.1175594  | 3282.5208311 | 0.003  | 0.99778    |
| AR4   | 5.5661009  | 2098.5099795 | 0.003  | 0.99788    |
| HH10  | -0.0049155 | 0.0893406    | -0.055 | 0.95612    |
| HH11  | 0.0407288  | 0.1078896    | 0.378  | 0.70580    |
| HH12  | -0.0736401 | 0.0824961    | -0.893 | 0.37205    |
| HH2   | -0.0545573 | 0.0659381    | -0.827 | 0.40801    |
| HH3   | 0.0386547  | 0.0784191    | 0.493  | 0.62207    |
| HH4   | -0.0597897 | 0.0745831    | -0.802 | 0.42275    |
| HH5   | -0.0982818 | 0.1657945    | -0.593 | 0.55332    |
| HH6   | 0.1878216  | 0.0945893    | 1.986  | 0.04707 *  |
| HH7   | -0.0000835 | 0.0653396    | -0.001 | 0.99898    |
| HH8   | -0.0254737 | 0.0575806    | -0.442 | 0.65820    |
| HH9   | -0.2880435 | 0.1046327    | -2.753 | 0.00591 ** |
| TSS1  | 0.1168892  | 0.0852531    | 1.371  | 0.17035    |
| TSS10 | 0.0180732  | 0.0572603    | 0.316  | 0.75228    |
| TSS11 | -0.0283440 | 0.0510323    | -0.555 | 0.57861    |
| TSS12 | -0.0247849 | 0.0449620    | -0.551 | 0.58147    |
| TSS13 | 0.0107678  | 0.0599137    | 0.180  | 0.85737    |
| TSS14 | 0.3006751  | 58.0360155   | 0.005  | 0.99587    |
| TSS15 | 0.3746772  | 57.0357329   | 0.007  | 0.99476    |
| TSS16 | 0.2000648  | 58.4147456   | 0.003  | 0.99727    |
| TSS17 | 0.3516671  | 58.2473379   | 0.006  | 0.99518    |
| TSS2  | 0.1346616  | 0.0881495    | 1.528  | 0.12660    |
| TSS21 | -0.0953492 | 0.0640693    | -1.488 | 0.13669    |
| TSS3  | 0.0152543  | 0.0810591    | 0.188  | 0.85073    |
| TSS4  | 0.0409127  | 0.0795903    | 0.514  | 0.60722    |
| TSS5  | -0.0112807 | 0.0721977    | -0.156 | 0.87584    |
| TSS6  | -0.0129015 | 0.0608755    | -0.212 | 0.83216    |
| TSS7  | -0.0107321 | 0.0562429    | -0.191 | 0.84867    |
| TSS8  | -0.0216080 | 0.0543248    | -0.398 | 0.69081    |
| TSS9  | -0.0450524 | 0.0463310    | -0.972 | 0.33085    |

---

Signif. codes: 0 '\*\*\*' 0.001 '\*\*' 0.01 '\*' 0.05 '.' 0.1 ' ' 1

(Dispersion parameter for binomial family taken to be 1)

## glm variable importance

|        | Overall |
|--------|---------|
| Yy2011 | 100.00  |
| GG9    | 91.75   |
| Yy2010 | 69.81   |
| HH9    | 61.46   |
| HH6    | 44.32   |
| TSS2   | 34.09   |
| TSS21  | 33.21   |
| TSS1   | 30.60   |
| IF987  | 28.63   |
| MM2    | 26.21   |
| IF10   | 25.63   |
| RU     | 25.33   |
| Yy2012 | 22.04   |
| INI3   | 21.85   |
| TSS9   | 21.69   |
| MM9    | 20.17   |
| HH12   | 19.91   |
| INI9   | 19.43   |
| HH2    | 18.45   |
| HH4    | 17.88   |

## Section 7

### Atlanta Validation Results

T1 = BCS; T2 =BCSR

#### Bayesian Network

Confusion Matrix and Statistics

|            | Reference |      |
|------------|-----------|------|
| Prediction | T1        | T2   |
| T1         | 107       | 473  |
| T2         | 63        | 1722 |

Accuracy : 0.7734  
95% CI : (0.7559, 0.7901)  
No Information Rate : 0.9281  
P-Value [Acc > NIR] : 1

Kappa : 0.1959  
McNemar's Test P-Value : <2e-16

Sensitivity : 0.62941  
Specificity : 0.78451  
Pos Pred Value : 0.18448  
Neg Pred Value : 0.96471  
Prevalence : 0.07188  
Detection Rate : 0.04524  
Detection Prevalence : 0.24524  
Balanced Accuracy : 0.70696

'Positive' Class : T1

#### Logistic Regression

Confusion Matrix and Statistics

|            | Reference |      |
|------------|-----------|------|
| Prediction | T1        | T2   |
| T1         | 94        | 486  |
| T2         | 9         | 1776 |

Accuracy : 0.7907  
95% CI : (0.7737, 0.8069)  
No Information Rate : 0.9564  
P-Value [Acc > NIR] : 1

Kappa : 0.2174  
McNemar's Test P-Value : <0.00000000000000002

Sensitivity : 0.91262  
Specificity : 0.78515  
Pos Pred Value : 0.16207  
Neg Pred Value : 0.99496  
Prevalence : 0.04355  
Detection Rate : 0.03975  
Detection Prevalence : 0.24524  
Balanced Accuracy : 0.84888

'Positive' Class : T1
